# Supplementary material for: hdac4 mediates perichondral ossification and pharyngeal skeleton development in the zebrafish
Source: PeerJ journal article supplement (doi:10.7717/peerj.6167), 2019-01-08

Samples: 13750  
Bases: 657  
Average spacing: 21

Page: 1 / 3  
6/30/2018

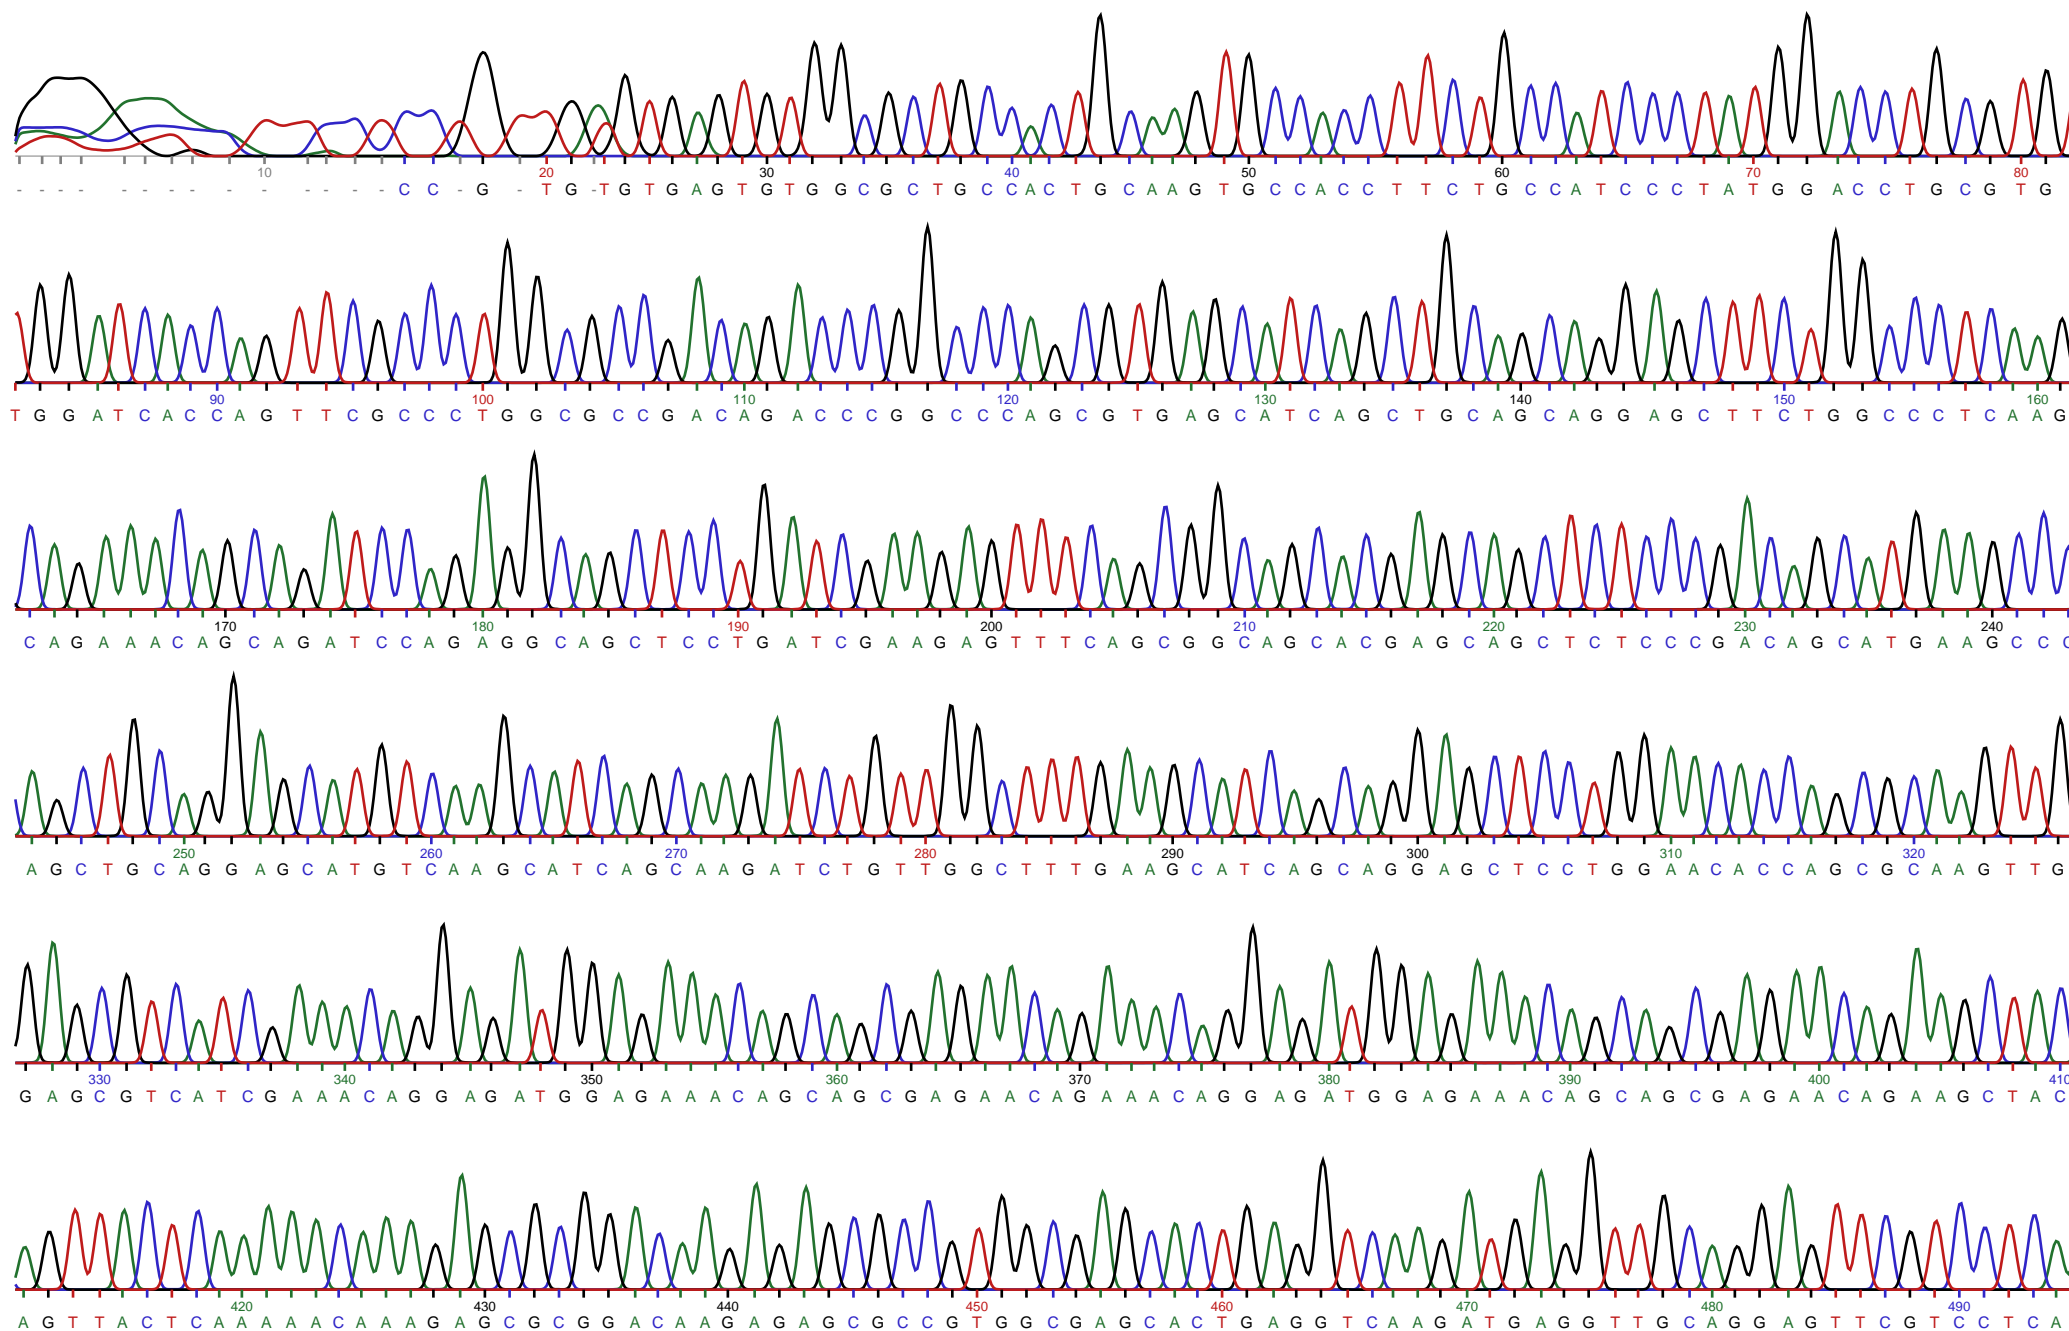

Samples: 13750  
Bases: 657  
Average spacing: 21

Page: 2 / 3  
6/30/2018

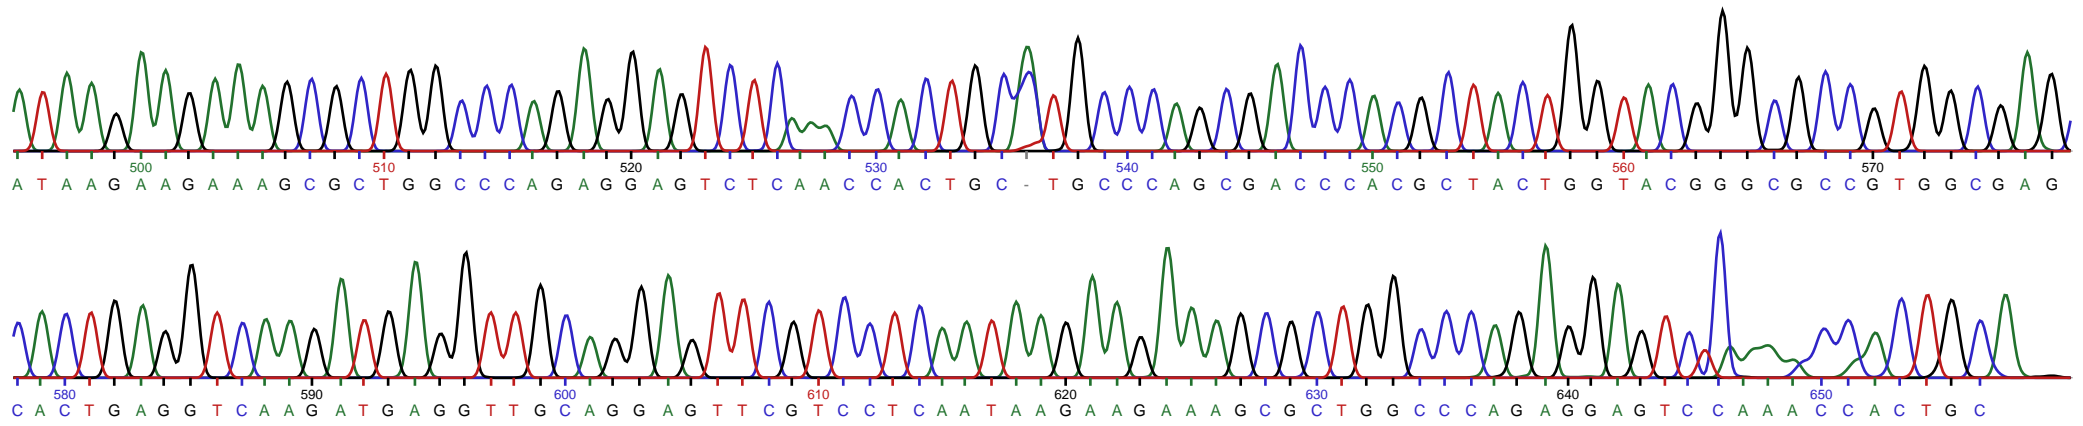

Samples: 13750  
Bases: 657  
Average spacing: 21

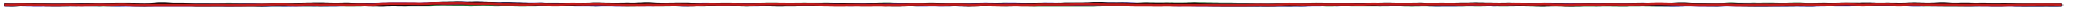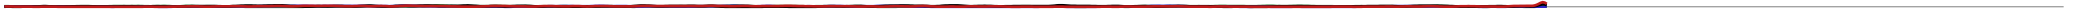

Supplement: 1448982_(2).zip [file 1448982_%282%29.zip]
