# Supplementary material for: hdac4 mediates perichondral ossification and pharyngeal skeleton development in the zebrafish
Source: PeerJ. 2019 Jan 8;7:e6167. doi: 10.7717/peerj.6167 (PMC6329341; doi:10.7717/peerj.6167)
Supplement: Data S6 — Analysis of mRNA in situ hybridization expression of runx2a in wild-type and mutant larvae at 4 dpf. Measurements are of the maximum length of expression (in microns) at the posterior and anterior margins of the left and right ceratohyal cartilages. [file peerj-07-6167-s006.xlsx]

## Sheet: Round 1 measurements
actual fish	geno	L CH post length	L CH ant length	R CH post length	R CH ant length
fish 29	mut	102	43.5	51.6	40.8
fish 34	mut	67.8	46.6	42.3	64.9
fish 33	mut	41.5	32	66.8	50.6
fish 6	WT	44	33.8	31.3	37.6
fish 21	mut	52.6	63.2	54.7	61.8
fish 10	WT	78	57.4	46.6	43.1
fish 6	mut	104	38.4	73.3	52.8
fish 16	WT	77.7	40.8	51.4	39.1
fish 1	mut	60.9	48.2	93.2	45
fish 23	WT	50	64	50	54.8
fish 13	mut	70.2	77.7	58.3	68.8
fish 28	WT	68.3	47.3	106	47.7
fish 30	WT	52.7	40.6	61.9	51.8
fish 26	WT	47.3	47.3	51	38.9
fish 17	mut	66.1	49	55.1	95.3
fish 19	WT	94.4	44.6	65.4	58.7
fish 3	mut	73.6	85.7	67.6	43.9
fish 13	WT	60.1	46.5	52.2	40.4
fish 20	mut	71.1	48.9	49.5	46.7
fish 5	WT	41.2	19.1	46.4	69.1
fish 22	mut	93.2	80.3	52.5	43.7

## Sheet: Round 2 measurements
actual fish	geno	L CH post length	L CH ant length	R CH post length	R CH ant length
fish 29	mut	97.8	45.8	53.3	46.5
fish 34	mut	70.3	44.8	39	57.4
fish 33	mut	43.2	35.4	67.4	48.3
fish 6	WT	38.6	37.7	33.5	44
fish 21	mut	57.3	68.1	60.5	63.8
fish 10	WT	72.6	56.8	55.3	35.1
fish 6	mut	99.1	37	71.3	56.8
fish 16	WT	82.8	45.2	47.6	44.2
fish 1	mut	63.4	50.2	93.9	47.5
fish 23	WT	51.1	63.6	51.3	52.1
fish 13	mut	70.8	83.2	58	70.7
fish 28	WT	72	41.7	105	50.4
fish 30	WT	54.5	46	56.2	59.7
fish 26	WT	54.2	45.6	50.1	39
fish 17	mut	63.7	45.1	61.7	89.2
fish 19	WT	94.7	48.4	65.1	52.6
fish 3	mut	74.8	79.6	61.3	47.8
fish 13	WT	58.1	53.4	50.2	47.5
fish 20	mut	77	55.9	53.4	51.7
fish 5	WT	43.1	19.8	42.6	70.5
fish 22	mut	84.9	77.8	53.2	42.9

## Sheet: Averages
actual fish	geno	L CH post length	L CH ant length	R CH post length	R CH post width	R CH ant length			actual fish	geno	L CH post length	L CH ant length	R CH post length	R CH post width	R CH ant length
fish 29	mut	102	43.5	51.6	4.87	40.8			fish 29	mut	99.9	44.65	52.45	5.52	43.65
fish 34	mut	67.8	46.6	42.3	4.19	64.9			fish 34	mut	69.05	45.7	40.65	5.539	61.15
fish 33	mut	41.5	32	66.8	4.36	50.6			fish 33	mut	42.35	33.7	67.1	4.505	49.45
fish 6	WT	44	33.8	31.3	5.1	37.6			fish 6	WT	41.3	35.75	32.4	4.59	40.8
fish 21	mut	52.6	63.2	54.7	6.27	61.8			fish 21	mut	54.95	65.65	57.6	5.04	62.8
fish 10	WT	78	57.4	46.6	3.54	43.1			fish 10	WT	75.3	57.1	50.95	3.935	39.1
fish 6	mut	104	38.4	73.3	5.45	52.8			fish 6	mut	101.55	37.7	72.3	5.47	54.8
fish 16	WT	77.7	40.8	51.4	3.84	39.1			fish 16	WT	80.25	43	49.5	4.375	41.65
fish 1	mut	60.9	48.2	93.2	67.9	45			fish 1	mut	62.15	49.2	93.55	36.46	46.25
fish 23	WT	50	64	50	5.54	54.8			fish 23	WT	50.55	63.8	50.65	5.665	53.45
fish 13	mut	70.2	77.7	58.3	4.84	68.8			fish 13	mut	70.5	80.45	58.15	4.535	69.75
fish 28	WT	68.3	47.3	106	5.35	47.7			fish 28	WT	70.15	44.5	105.5	5.17	49.05
fish 30	WT	52.7	40.6	61.9	5.21	51.8			fish 30	WT	53.6	43.3	59.05	5.01	55.75
fish 26	WT	47.3	47.3	51	6.25	38.9			fish 26	WT	50.75	46.45	50.55	5.6	38.95
fish 17	mut	66.1	49	55.1	4.79	95.3			fish 17	mut	64.9	47.05	58.4	4.32	92.25
fish 19	WT	94.4	44.6	65.4	7	58.7			fish 19	WT	94.55	46.5	65.25	6.58	55.65
fish 3	mut	73.6	85.7	67.6	5.53	43.9			fish 3	mut	74.2	82.65	64.45	5.07	45.85
fish 13	WT	60.1	46.5	52.2	4.71	40.4			fish 13	WT	59.1	49.95	51.2	5.015	43.95
fish 20	mut	71.1	48.9	49.5	6.43	46.7			fish 20	mut	74.05	52.4	51.45	5.815	49.2
fish 5	WT	41.2	19.1	46.4	4.48	69.1			fish 5	WT	42.15	19.45	44.5	4.31	69.8
fish 22	mut	93.2	80.3	52.5	5.23	43.7			fish 22	mut	89.05	79.05	52.85	4.875	43.3
actual fish	geno	L CH post length	L CH ant length	R CH post length	R CH post width	R CH ant length
fish 29	mut	97.8	45.8	53.3	6.17	46.5
fish 34	mut	70.3	44.8	39	6.888	57.4
fish 33	mut	43.2	35.4	67.4	4.65	48.3
fish 6	WT	38.6	37.7	33.5	4.08	44
fish 21	mut	57.3	68.1	60.5	3.81	63.8
fish 10	WT	72.6	56.8	55.3	4.33	35.1
fish 6	mut	99.1	37	71.3	5.49	56.8
fish 16	WT	82.8	45.2	47.6	4.91	44.2
fish 1	mut	63.4	50.2	93.9	5.02	47.5
fish 23	WT	51.1	63.6	51.3	5.79	52.1
fish 13	mut	70.8	83.2	58	4.23	70.7
fish 28	WT	72	41.7	105	4.99	50.4
fish 30	WT	54.5	46	56.2	4.81	59.7
fish 26	WT	54.2	45.6	50.1	4.95	39
fish 17	mut	63.7	45.1	61.7	3.85	89.2
fish 19	WT	94.7	48.4	65.1	6.16	52.6
fish 3	mut	74.8	79.6	61.3	4.61	47.8
fish 13	WT	58.1	53.4	50.2	5.32	47.5
fish 20	mut	77	55.9	53.4	5.2	51.7
fish 5	WT	43.1	19.8	42.6	4.14	70.5
fish 22	mut	84.9	77.8	53.2	4.52	42.9

## Sheet: differences
actual fish	L CH post length	L CH post length	S1-S2		actual fish	R CH post length	R CH post length	S1-S2		actual fish	L CH ant length	L CH ant length	S1-S2			actual fish	R CH ant length	R CH ant length	S1-S2
fish 29	102	97.8	4.2		fish 29	51.6	53.3	-1.7		fish 29	43.5	45.8	-2.3			fish 29	40.8	46.5	-5.7
fish 34	67.8	70.3	-2.5		fish 34	42.3	39	3.3		fish 34	46.6	44.8	1.8			fish 34	64.9	57.4	7.5
fish 33	41.5	43.2	-1.7		fish 33	66.8	67.4	-0.6		fish 33	32	35.4	-3.4			fish 33	50.6	48.3	2.3
fish 6	44	38.6	5.4		fish 6	31.3	33.5	-2.2		fish 6	33.8	37.7	-3.9			fish 6	37.6	44	-6.4
fish 21	52.6	57.3	-4.7		fish 21	54.7	60.5	-5.8		fish 21	63.2	68.1	-4.9			fish 21	61.8	63.8	-2
fish 10	78	72.6	5.4		fish 10	46.6	55.3	-8.7		fish 10	57.4	56.8	0.6			fish 10	43.1	35.1	8
fish 6	104	99.1	4.9		fish 6	73.3	71.3	2		fish 6	38.4	37	1.4			fish 6	52.8	56.8	-4
fish 16	77.7	82.8	-5.1		fish 16	51.4	47.6	3.8		fish 16	40.8	45.2	-4.4			fish 16	39.1	44.2	-5.1
fish 1	60.9	63.4	-2.5		fish 1	93.2	93.9	-0.7		fish 1	48.2	50.2	-2			fish 1	45	47.5	-2.5
fish 23	50	51.1	-1.1		fish 23	50	51.3	-1.3		fish 23	64	63.6	0.4			fish 23	54.8	52.1	2.7
fish 13	70.2	70.8	-0.6		fish 13	58.3	58	0.3		fish 13	77.7	83.2	-5.5			fish 13	68.8	70.7	-1.9
fish 28	68.3	72	-3.7		fish 28	106	105	1		fish 28	47.3	41.7	5.6			fish 28	47.7	50.4	-2.7
fish 30	52.7	54.5	-1.8		fish 30	61.9	56.2	5.7		fish 30	40.6	46	-5.4			fish 30	51.8	59.7	-7.9
fish 26	47.3	54.2	-6.9		fish 26	51	50.1	0.9		fish 26	47.3	45.6	1.7			fish 26	38.9	39	-0.1
fish 17	66.1	63.7	2.4		fish 17	55.1	61.7	-6.6		fish 17	49	45.1	3.9			fish 17	95.3	89.2	6.1
fish 19	94.4	94.7	-0.3		fish 19	65.4	65.1	0.3		fish 19	44.6	48.4	-3.8			fish 19	58.7	52.6	6.1
fish 3	73.6	74.8	-1.2		fish 3	67.6	61.3	6.3		fish 3	85.7	79.6	6.1			fish 3	43.9	47.8	-3.9
fish 13	60.1	58.1	2		fish 13	52.2	50.2	2		fish 13	46.5	53.4	-6.9			fish 13	40.4	47.5	-7.1
fish 20	71.1	77	-5.9		fish 20	49.5	53.4	-3.9		fish 20	48.9	55.9	-7			fish 20	46.7	51.7	-5
fish 5	41.2	43.1	-1.9		fish 5	46.4	42.6	3.8		fish 5	19.1	19.8	-0.7			fish 5	69.1	70.5	-1.4
fish 22	93.2	84.9	8.3		fish 22	52.5	53.2	-0.7		fish 22	80.3	77.8	2.5			fish 22	43.7	42.9	0.8

## Sheet: length averages
actual fish	geno	L CH post length	L CH ant length	R CH post length	R CH ant length	SUM	divide by 4
fish 29	mut	99.9	44.65	52.45	43.65	240.65	60.1625
fish 34	mut	69.05	45.7	40.65	61.15	216.55	54.1375
fish 33	mut	42.35	33.7	67.1	49.45	192.6	48.15
fish 6	WT	41.3	35.75	32.4	40.8	150.25	37.5625
fish 21	mut	54.95	65.65	57.6	62.8	241	60.25
fish 10	WT	75.3	57.1	50.95	39.1	222.45	55.6125
fish 6	mut	101.55	37.7	72.3	54.8	266.35	66.5875
fish 16	WT	80.25	43	49.5	41.65	214.4	53.6
fish 1	mut	62.15	49.2	93.55	46.25	251.15	62.7875
fish 23	WT	50.55	63.8	50.65	53.45	218.45	54.6125
fish 13	mut	70.5	80.45	58.15	69.75	278.85	69.7125
fish 28	WT	70.15	44.5	105.5	49.05	269.2	67.3
fish 30	WT	53.6	43.3	59.05	55.75	211.7	52.925
fish 26	WT	50.75	46.45	50.55	38.95	186.7	46.675
fish 17	mut	64.9	47.05	58.4	92.25	262.6	65.65
fish 19	WT	94.55	46.5	65.25	55.65	261.95	65.4875
fish 3	mut	74.2	82.65	64.45	45.85	267.15	66.7875
fish 13	WT	59.1	49.95	51.2	43.95	204.2	51.05
fish 20	mut	74.05	52.4	51.45	49.2	227.1	56.775
fish 5	WT	42.15	19.45	44.5	69.8	175.9	43.975
fish 22	mut	89.05	79.05	52.85	43.3	264.25	66.0625

## Sheet: sort
actual fish	geno	L CH post length	L CH ant length	R CH post length	R CH ant length	SUM	divide by 4
fish 29	mut	99.9	44.65	52.45	43.65	240.65	60.1625
fish 34	mut	69.05	45.7	40.65	61.15	216.55	54.1375
fish 33	mut	42.35	33.7	67.1	49.45	192.6	48.15
fish 21	mut	54.95	65.65	57.6	62.8	241	60.25
fish 6	mut	101.55	37.7	72.3	54.8	266.35	66.5875
fish 1	mut	62.15	49.2	93.55	46.25	251.15	62.7875
fish 13	mut	70.5	80.45	58.15	69.75	278.85	69.7125
fish 17	mut	64.9	47.05	58.4	92.25	262.6	65.65
fish 3	mut	74.2	82.65	64.45	45.85	267.15	66.7875
fish 20	mut	74.05	52.4	51.45	49.2	227.1	56.775
fish 22	mut	89.05	79.05	52.85	43.3	264.25	66.0625
fish 6	WT	41.3	35.75	32.4	40.8	150.25	37.5625
fish 10	WT	75.3	57.1	50.95	39.1	222.45	55.6125
fish 16	WT	80.25	43	49.5	41.65	214.4	53.6
fish 23	WT	50.55	63.8	50.65	53.45	218.45	54.6125
fish 28	WT	70.15	44.5	105.5	49.05	269.2	67.3
fish 30	WT	53.6	43.3	59.05	55.75	211.7	52.925
fish 26	WT	50.75	46.45	50.55	38.95	186.7	46.675
fish 19	WT	94.55	46.5	65.25	55.65	261.95	65.4875
fish 13	WT	59.1	49.95	51.2	43.95	204.2	51.05
fish 5	WT	42.15	19.45	44.5	69.8	175.9	43.975

## Sheet: avg,stdev,SEM
actual fish	geno	expression (avg. length)				37.5625	60.1625
fish 29	mut	60.1625				55.6125	54.1375
fish 34	mut	54.1375				53.6	48.15
fish 33	mut	48.15				54.6125	60.25
fish 21	mut	60.25				67.3	66.5875
fish 6	mut	66.5875				52.925	62.7875
fish 1	mut	62.7875				46.675	69.7125
fish 13	mut	69.7125				65.4875	65.65
fish 17	mut	65.65				51.05	66.7875
fish 3	mut	66.7875				43.975	56.775
fish 20	mut	56.775					66.0625
fish 22	mut	66.0625
fish 6	WT	37.5625
fish 10	WT	55.6125
fish 16	WT	53.6
fish 23	WT	54.6125
fish 28	WT	67.3
fish 30	WT	52.925
fish 26	WT	46.675
fish 19	WT	65.4875
fish 13	WT	51.05
fish 5	WT	43.975
	average	stdev	SEM
WT	52.88	9.02866	2.85511
mut	61.5511	6.47348	1.95183

## Sheet: ANOVA
Anova: Single Factor
SUMMARY
Groups	Count	Sum	Average	Variance
Column 1	10	528.8	52.88	81.5166
Column 2	11	677.062	61.5511	41.9059
ANOVA
Source of Variation	SS	df	MS	F	P-value	F crit
Between Groups	393.845	1	393.845	6.49171	0.019647	4.38075
Within Groups	1152.71	19	60.6689
Total	1546.55	20
