# Supplementary material for: hdac4 mediates perichondral ossification and pharyngeal skeleton development in the zebrafish
Source: PeerJ. 2019 Jan 8;7:e6167. doi: 10.7717/peerj.6167 (PMC6329341; doi:10.7717/peerj.6167)
Supplement: Data S7 — Analysis of mRNA in situ hybridization expression of runx2b in wild-type and mutant larvae at 4 dpf. Measurements are of the maximum length of expression (in microns) at the posterior and anterior margins of the left and right ceratohyal cartilages. [file peerj-07-6167-s007.xlsx]

## Sheet: Round 1 measurements
actual fish	geno	L CH post length	L CH ant length	R CH post length	R CH ant length
fish 9	WT	36.7	4.58	42	21.3
fish 18	mut	43	27	41.5	15.7
fish 7	WT	36.7	24.6	42.5	27.1
fish 22	mut	36.6	30.1	43.4	38.4
fish 24	mut	45	23.9	50.9	35.7
fish 10	WT	33.4	21.3	34.5	19.1
fish 12	WT	43.2	22	34.5	26.9
fish 20	mut	45.6	23.2	46	24.1
fish 6	WT	38.7	26.2	25.6	22.7
fish 19	mut	44.7	30.2	47.1	26.1
fish 26	mut	34.3	21.3	53.3	29.8
fish 8	WT	50.4	20.4	41.1	36.5
fish 11	WT	37.4	36.1	34.1	21.3
fish 25	mut	52.7	30.4	44.5	32.3
fish 23	mut	44.3	22.3	47.3	26.5
fish 13	WT	29.1	15.3	30.2	29.2
fish 21	mut	41.5	28.4	39.1	32.7

## Sheet: Round 2 measurements
actual fish	geno	L CH post length	L CH ant length	R CH post length	R CH ant length
fish 9	WT	36.1	5.88	42.7	20.8
fish 18	mut	43.3	27.8	40.3	13.5
fish 7	WT	36.5	23.4	42.1	26.5
fish 22	mut	33.3	28.9	42.7	38
fish 24	mut	36.9	23.3	48.5	34.4
fish 10	WT	38.8	18.8	39.9	20.8
fish 12	WT	41.5	23.7	32.1	32.9
fish 20	mut	42	22.3	43.3	23.7
fish 6	WT	37.2	24.3	25.4	24
fish 19	mut	45.3	30.7	43.1	26.6
fish 26	mut	34.7	21.2	51.9	30.2
fish 8	WT	47.5	22.6	38.1	37.1
fish 11	WT	37.7	38.3	39.3	19.4
fish 25	mut	51.9	28.5	48.2	33.5
fish 23	mut	41	22	46.9	24.6
fish 13	WT	29.7	15.4	32.1	26.1
fish 21	mut	44.5	26.8	39.9	33.9

## Sheet: differences
actual fish	L CH post length	L CH post length	S1-S2		actual fish	L CH ant length	L CH ant length	S1-S2		actual fish	R CH post length	R CH post length	S1-S2		actual fish	R CH ant length	R CH ant length	S1-S2
fish 9	36.7	36.1	0.6		fish 9	4.58	5.88	-1.3		fish 9	42	42.7	-0.7		fish 9	21.3	20.8	0.5
fish 18	43	43.3	-0.3		fish 18	27	27.8	-0.8		fish 18	41.5	40.3	1.2		fish 18	15.7	13.5	2.2
fish 7	36.7	36.5	0.2		fish 7	24.6	23.4	1.2		fish 7	42.5	42.1	0.4		fish 7	27.1	26.5	0.6
fish 22	36.6	33.3	3.3		fish 22	30.1	28.9	1.2		fish 22	43.4	42.7	0.7		fish 22	38.4	38	0.4
fish 24	45	36.9	8.1		fish 24	23.9	23.3	0.6		fish 24	50.9	48.5	2.4		fish 24	35.7	34.4	1.3
fish 10	33.4	38.8	-5.4		fish 10	21.3	18.8	2.5		fish 10	34.5	39.9	-5.4		fish 10	19.1	20.8	-1.7
fish 12	43.2	41.5	1.7		fish 12	22	23.7	-1.7		fish 12	34.5	32.1	2.4		fish 12	26.9	32.9	-6
fish 20	45.6	42	3.6		fish 20	23.2	22.3	0.9		fish 20	46	43.3	2.7		fish 20	24.1	23.7	0.4
fish 6	38.7	37.2	1.5		fish 6	26.2	24.3	1.9		fish 6	25.6	25.4	0.2		fish 6	22.7	24	-1.3
fish 19	44.7	45.3	-0.6		fish 19	30.2	30.7	-0.5		fish 19	47.1	43.1	4		fish 19	26.1	26.6	-0.5
fish 26	34.3	34.7	-0.4		fish 26	21.3	21.2	0.1		fish 26	53.3	51.9	1.4		fish 26	29.8	30.2	-0.4
fish 8	50.4	47.5	2.9		fish 8	20.4	22.6	-2.2		fish 8	41.1	38.1	3		fish 8	36.5	37.1	-0.6
fish 11	37.4	37.7	-0.3		fish 11	36.1	38.3	-2.2		fish 11	34.1	39.3	-5.2		fish 11	21.3	19.4	1.9
fish 25	52.7	51.9	0.8		fish 25	30.4	28.5	1.9		fish 25	44.5	48.2	-3.7		fish 25	32.3	33.5	-1.2
fish 23	44.3	41	3.3		fish 23	22.3	22	0.3		fish 23	47.3	46.9	0.4		fish 23	26.5	24.6	1.9
fish 13	29.1	29.7	-0.6		fish 13	15.3	15.4	-0.1		fish 13	30.2	32.1	-1.9		fish 13	29.2	26.1	3.1
fish 21	41.5	44.5	-3		fish 21	28.4	26.8	1.6		fish 21	39.1	39.9	-0.8		fish 21	32.7	33.9	-1.2

## Sheet: Averages
actual fish	geno	L CH post length	L CH ant length	R CH post length	R CH ant length			actual fish	geno	L CH post length	L CH ant length	R CH post length	R CH ant length
fish 9	WT	36.7	4.58	42	21.3			fish 9	WT	36.4	5.23	42.35	21.05
fish 18	mut	43	27	41.5	15.7			fish 18	mut	43.15	27.4	40.9	14.6
fish 7	WT	36.7	24.6	42.5	27.1			fish 7	WT	36.6	24	42.3	26.8
fish 22	mut	36.6	30.1	43.4	38.4			fish 22	mut	34.95	29.5	43.05	38.2
fish 24	mut	45	23.9	50.9	35.7			fish 24	mut	40.95	23.6	49.7	35.05
fish 10	WT	33.4	21.3	34.5	19.1			fish 10	WT	36.1	20.05	37.2	19.95
fish 12	WT	43.2	22	34.5	26.9			fish 12	WT	42.35	22.85	33.3	29.9
fish 20	mut	45.6	23.2	46	24.1			fish 20	mut	43.8	22.75	44.65	23.9
fish 6	WT	38.7	26.2	25.6	22.7			fish 6	WT	37.95	25.25	25.5	23.35
fish 19	mut	44.7	30.2	47.1	26.1			fish 19	mut	45	30.45	45.1	26.35
fish 26	mut	34.3	21.3	53.3	29.8			fish 26	mut	34.5	21.25	52.6	30
fish 8	WT	50.4	20.4	41.1	36.5			fish 8	WT	48.95	21.5	39.6	36.8
fish 11	WT	37.4	36.1	34.1	21.3			fish 11	WT	37.55	37.2	36.7	20.35
fish 25	mut	52.7	30.4	44.5	32.3			fish 25	mut	52.3	29.45	46.35	32.9
fish 23	mut	44.3	22.3	47.3	26.5			fish 23	mut	42.65	22.15	47.1	25.55
fish 13	WT	29.1	15.3	30.2	29.2			fish 13	WT	29.4	15.35	31.15	27.65
fish 21	mut	41.5	28.4	39.1	32.7			fish 21	mut	43	27.6	39.5	33.3
actual fish	geno	L CH post length	L CH ant length	R CH post length	R CH ant length
fish 9	WT	36.1	5.88	42.7	20.8
fish 18	mut	43.3	27.8	40.3	13.5
fish 7	WT	36.5	23.4	42.1	26.5
fish 22	mut	33.3	28.9	42.7	38
fish 24	mut	36.9	23.3	48.5	34.4
fish 10	WT	38.8	18.8	39.9	20.8
fish 12	WT	41.5	23.7	32.1	32.9
fish 20	mut	42	22.3	43.3	23.7
fish 6	WT	37.2	24.3	25.4	24
fish 19	mut	45.3	30.7	43.1	26.6
fish 26	mut	34.7	21.2	51.9	30.2
fish 8	WT	47.5	22.6	38.1	37.1
fish 11	WT	37.7	38.3	39.3	19.4
fish 25	mut	51.9	28.5	48.2	33.5
fish 23	mut	41	22	46.9	24.6
fish 13	WT	29.7	15.4	32.1	26.1
fish 21	mut	44.5	26.8	39.9	33.9

## Sheet: length averages
actual fish	geno	L CH post length	L CH ant length	R CH post length	R CH ant length	SUM	divide by 4
fish 9	WT	36.4	5.23	42.35	21.05	105.03	26.2575
fish 18	mut	43.15	27.4	40.9	14.6	126.05	31.5125
fish 7	WT	36.6	24	42.3	26.8	129.7	32.425
fish 22	mut	34.95	29.5	43.05	38.2	145.7	36.425
fish 24	mut	40.95	23.6	49.7	35.05	149.3	37.325
fish 10	WT	36.1	20.05	37.2	19.95	113.3	28.325
fish 12	WT	42.35	22.85	33.3	29.9	128.4	32.1
fish 20	mut	43.8	22.75	44.65	23.9	135.1	33.775
fish 6	WT	37.95	25.25	25.5	23.35	112.05	28.0125
fish 19	mut	45	30.45	45.1	26.35	146.9	36.725
fish 26	mut	34.5	21.25	52.6	30	138.35	34.5875
fish 8	WT	48.95	21.5	39.6	36.8	146.85	36.7125
fish 11	WT	37.55	37.2	36.7	20.35	131.8	32.95
fish 25	mut	52.3	29.45	46.35	32.9	161	40.25
fish 23	mut	42.65	22.15	47.1	25.55	137.45	34.3625
fish 13	WT	29.4	15.35	31.15	27.65	103.55	25.8875
fish 21	mut	43	27.6	39.5	33.3	143.4	35.85

## Sheet: sort
actual fish	geno	L CH post length	L CH ant length	R CH post length	R CH ant length	SUM	divide by 4
fish 18	mut	43.15	27.4	40.9	14.6	126.05	31.5125
fish 22	mut	34.95	29.5	43.05	38.2	145.7	36.425
fish 24	mut	40.95	23.6	49.7	35.05	149.3	37.325
fish 20	mut	43.8	22.75	44.65	23.9	135.1	33.775
fish 19	mut	45	30.45	45.1	26.35	146.9	36.725
fish 26	mut	34.5	21.25	52.6	30	138.35	34.5875
fish 25	mut	52.3	29.45	46.35	32.9	161	40.25
fish 23	mut	42.65	22.15	47.1	25.55	137.45	34.3625
fish 21	mut	43	27.6	39.5	33.3	143.4	35.85
fish 9	WT	36.4	5.23	42.35	21.05	105.03	26.2575
fish 7	WT	36.6	24	42.3	26.8	129.7	32.425
fish 10	WT	36.1	20.05	37.2	19.95	113.3	28.325
fish 12	WT	42.35	22.85	33.3	29.9	128.4	32.1
fish 6	WT	37.95	25.25	25.5	23.35	112.05	28.0125
fish 8	WT	48.95	21.5	39.6	36.8	146.85	36.7125
fish 11	WT	37.55	37.2	36.7	20.35	131.8	32.95
fish 13	WT	29.4	15.35	31.15	27.65	103.55	25.8875

## Sheet: avg,stdev,SEM
actual fish	geno	expression (avg. length)			26.2575	31.5125
fish 18	mut	31.5125			32.425	36.425
fish 22	mut	36.425			28.325	37.325
fish 24	mut	37.325			32.1	33.775
fish 20	mut	33.775			28.0125	36.725
fish 19	mut	36.725			36.7125	34.5875
fish 26	mut	34.5875			32.95	40.25
fish 25	mut	40.25			25.8875	34.3625
fish 23	mut	34.3625				35.85
fish 21	mut	35.85
fish 9	WT	26.2575
fish 7	WT	32.425
fish 10	WT	28.325
fish 12	WT	32.1
fish 6	WT	28.0125
fish 8	WT	36.7125
fish 11	WT	32.95
fish 13	WT	25.8875
	average	stdev	SEM
WT	30.3338	3.79538	1.34187
mut	35.6458	2.47949	0.826495

## Sheet: ANOVA
Anova: Single Factor
SUMMARY
Groups	Count	Sum	Average	Variance
Column 1	8	242.67	30.3338	14.4049
Column 2	9	320.812	35.6458	6.14785
ANOVA
Source of Variation	SS	df	MS	F	P-value	F crit
Between Groups	119.513	1	119.513	11.9499	0.00352191	4.54308
Within Groups	150.017	15	10.0011
Total	269.53	16
