# Supplementary material for: hdac4 mediates perichondral ossification and pharyngeal skeleton development in the zebrafish
Source: PeerJ. 2019 Jan 8;7:e6167. doi: 10.7717/peerj.6167 (PMC6329341; doi:10.7717/peerj.6167)
Supplement: Data S8 — Analysis of mRNA in situ hybridization expression of sp7 in wild-type and mutant larvae at 4 dpf. Measurements are of the maximum length of expression (in microns) at the posterior and anterior margins of the left and right ceratohyal cartilages. [file peerj-07-6167-s008.xlsx]

## Sheet: Round 1 measurements
actual fish	geno	L CH post length	L CH ant length	R CH post length	R CH ant length
fish 12	WT	24.4	8.79	23	0
fish 9	WT	16.5	0	10.1	0
fish 15	WT	21.5	14.2	21.3	16.2
fish 6	WT	19.9	18.8	26.9	14.7
fish 21	mut	20.3	0	16.6	15.1
fish 28	mut	6.97	8.86	31.2	16.3
fish 24	mut	21.8	3.38	18.8	0
fish 25	mut	6.26	0	6.26	0
fish 27	mut	18.7	0	11.8	0
fish 22	mut	6.77	1.74	11.3	0
fish 20	mut	19.4	3.25	18.9	6.36
fish 7	WT	13.9	9.9	16.7	13.1
fish 19	mut	26.6	10.9	32	8.73
fish 8	WT	0	0	9.34	6.04
fish 11	WT	30.5	20.9	33.2	4.51
fish 14	WT	24.6	4.12	13.1	0
fish 23	mut	12.9	0	13.6	6.13
fish 4	WT	9.9	0	11.3	0
fish 26	mut	19.9	13.4	19.2	6.74
fish 13	WT	16.1	6.85	13.8	0
fish 10	WT	0	0	13.2	0
fish 5	WT	5.98	4.13	8.43	9.09

## Sheet: Round 2 measurements
actual fish	geno	L CH post length	L CH ant length	R CH post length	R CH ant length
fish 12	WT	21.3	8.35	20.6	3.42
fish 9	WT	14.8	0	10.6	0
fish 15	WT	20.2	13.2	20.9	16.2
fish 6	WT	20.9	18.9	23.5	13.2
fish 21	mut	21.1	0	16	12.1
fish 28	mut	6.85	9.33	27.7	17
fish 24	mut	21.6	3.83	22.3	0
fish 25	mut	3.35	0	3.72	3.89
fish 27	mut	18.5	0	17.2	0
fish 22	mut	8.25	0	13.1	0
fish 20	mut	18.9	0	17	6.1
fish 7	WT	14	7.67	18.2	13.5
fish 19	mut	28.4	8.82	31.6	9.24
fish 8	WT	0	0	8.9	7.3
fish 11	WT	27.6	17.1	34	0
fish 14	WT	27.2	0	12.9	0
fish 23	mut	10.3	0	15.2	4.84
fish 4	WT	12.3	0	10.2	0
fish 26	mut	19.9	11.7	17.7	5.79
fish 13	WT	16.5	7.41	10.3	0
fish 10	WT	0	0	14.8	0
fish 5	WT	2.87	3.36	7.1	9.11

## Sheet: differences
actual fish	L CH post length	L CH post length	S1-S2			actual fish	L CH ant length	L CH ant length	S1-S2
fish 12	24.4	21.3	3.1			fish 12	8.79	8.35	0.44
fish 9	16.5	14.8	1.7			fish 9	0	0	0
fish 15	21.5	20.2	1.3			fish 15	14.2	13.2	1
fish 6	19.9	20.9	-1			fish 6	18.8	18.9	-0.1
fish 21	20.3	21.1	-0.8			fish 21	0	0	0
fish 28	6.97	6.85	0.12			fish 28	8.86	9.33	-0.47
fish 24	21.8	21.6	0.2			fish 24	3.38	3.83	-0.45
fish 25	6.26	3.35	2.91			fish 25	0	0	0
fish 27	18.7	18.5	0.2			fish 27	0	0	0
fish 22	6.77	8.25	-1.48			fish 22	1.74	0	1.74
fish 20	19.4	18.9	0.5			fish 20	3.25	0	3.25
fish 7	13.9	14	-0.1			fish 7	9.9	7.67	2.23
fish 19	26.6	28.4	-1.8			fish 19	10.9	8.82	2.08
fish 8	0	0	0			fish 8	0	0	0
fish 11	30.5	27.6	2.9			fish 11	20.9	17.1	3.8
fish 14	24.6	27.2	-2.6			fish 14	4.12	0	4.12
fish 23	12.9	10.3	2.6			fish 23	0	0	0
fish 4	9.9	12.3	-2.4			fish 4	0	0	0
fish 26	19.9	19.9	0			fish 26	13.4	11.7	1.7
fish 13	16.1	16.5	-0.4			fish 13	6.85	7.41	-0.56
fish 10	0	0	0			fish 10	0	0	0
fish 5	5.98	2.87	3.11			fish 5	4.13	3.36	0.77
actual fish	R CH post length	R CH post length	S1-S2			actual fish	R CH ant length	R CH ant length	S1-S2
fish 12	23	20.6	2.4			fish 12	0	3.42	-3.42
fish 9	10.1	10.6	-0.5			fish 9	0	0	0
fish 15	21.3	20.9	0.4			fish 15	16.2	16.2	0
fish 6	26.9	23.5	3.4			fish 6	14.7	13.2	1.5
fish 21	16.6	16	0.6			fish 21	15.1	12.1	3
fish 28	31.2	27.7	3.5			fish 28	16.3	17	-0.7
fish 24	18.8	22.3	-3.5			fish 24	0	0	0
fish 25	6.26	3.72	2.54			fish 25	0	3.89	-3.89
fish 27	11.8	17.2	-5.4			fish 27	0	0	0
fish 22	11.3	13.1	-1.8			fish 22	0	0	0
fish 20	18.9	17	1.9			fish 20	6.36	6.1	0.26
fish 7	16.7	18.2	-1.5			fish 7	13.1	13.5	-0.4
fish 19	32	31.6	0.4			fish 19	8.73	9.24	-0.51
fish 8	9.34	8.9	0.44			fish 8	6.04	7.3	-1.26
fish 11	33.2	34	-0.8			fish 11	4.51	0	4.51
fish 14	13.1	12.9	0.2			fish 14	0	0	0
fish 23	13.6	15.2	-1.6			fish 23	6.13	4.84	1.29
fish 4	11.3	10.2	1.1			fish 4	0	0	0
fish 26	19.2	17.7	1.5			fish 26	6.74	5.79	0.95
fish 13	13.8	10.3	3.5			fish 13	0	0	0
fish 10	13.2	14.8	-1.6			fish 10	0	0	0
fish 5	8.43	7.1	1.33			fish 5	9.09	9.11	-0.02

## Sheet: Averages
actual fish	geno	L CH post length	L CH ant length	R CH post length	R CH ant length			actual fish	geno	L CH post length	L CH ant length	R CH post length	R CH ant length
fish 12	WT	24.4	8.79	23	0			fish 12	WT	45.7	17.14	43.6	3.42
fish 9	WT	16.5	0	10.1	0			fish 9	WT	31.3	0	20.7	0
fish 15	WT	21.5	14.2	21.3	16.2			fish 15	WT	41.7	27.4	42.2	32.4
fish 6	WT	19.9	18.8	26.9	14.7			fish 6	WT	40.8	37.7	50.4	27.9
fish 21	mut	20.3	0	16.6	15.1			fish 21	mut	41.4	0	32.6	27.2
fish 28	mut	6.97	8.86	31.2	16.3			fish 28	mut	13.82	18.19	58.9	33.3
fish 24	mut	21.8	3.38	18.8	0			fish 24	mut	43.4	7.21	41.1	0
fish 25	mut	6.26	0	6.26	0			fish 25	mut	9.61	0	9.98	3.89
fish 27	mut	18.7	0	11.8	0			fish 27	mut	37.2	0	29	0
fish 22	mut	6.77	1.74	11.3	0			fish 22	mut	15.02	1.74	24.4	0
fish 20	mut	19.4	3.25	18.9	6.36			fish 20	mut	38.3	3.25	35.9	12.46
fish 7	WT	13.9	9.9	16.7	13.1			fish 7	WT	27.9	17.57	34.9	26.6
fish 19	mut	26.6	10.9	32	8.73			fish 19	mut	55	19.72	63.6	17.97
fish 8	WT	0	0	9.34	6.04			fish 8	WT	0	0	18.24	13.34
fish 11	WT	30.5	20.9	33.2	4.51			fish 11	WT	58.1	38	67.2	4.51
fish 14	WT	24.6	4.12	13.1	0			fish 14	WT	51.8	4.12	26	0
fish 23	mut	12.9	0	13.6	6.13			fish 23	mut	23.2	0	28.8	10.97
fish 4	WT	9.9	0	11.3	0			fish 4	WT	22.2	0	21.5	0
fish 26	mut	19.9	13.4	19.2	6.74			fish 26	mut	39.8	25.1	36.9	12.53
fish 13	WT	16.1	6.85	13.8	0			fish 13	WT	32.6	14.26	24.1	0
fish 10	WT	0	0	13.2	0			fish 10	WT	0	0	28	0
fish 5	WT	5.98	4.13	8.43	9.09			fish 5	WT	8.85	7.49	15.53	18.2
actual fish	geno	L CH post length	L CH ant length	R CH post length	R CH ant length
fish 12	WT	21.3	8.35	20.6	3.42
fish 9	WT	14.8	0	10.6	0
fish 15	WT	20.2	13.2	20.9	16.2
fish 6	WT	20.9	18.9	23.5	13.2
fish 21	mut	21.1	0	16	12.1
fish 28	mut	6.85	9.33	27.7	17
fish 24	mut	21.6	3.83	22.3	0
fish 25	mut	3.35	0	3.72	3.89
fish 27	mut	18.5	0	17.2	0
fish 22	mut	8.25	0	13.1	0
fish 20	mut	18.9	0	17	6.1
fish 7	WT	14	7.67	18.2	13.5
fish 19	mut	28.4	8.82	31.6	9.24
fish 8	WT	0	0	8.9	7.3
fish 11	WT	27.6	17.1	34	0
fish 14	WT	27.2	0	12.9	0
fish 23	mut	10.3	0	15.2	4.84
fish 4	WT	12.3	0	10.2	0
fish 26	mut	19.9	11.7	17.7	5.79
fish 13	WT	16.5	7.41	10.3	0
fish 10	WT	0	0	14.8	0
fish 5	WT	2.87	3.36	7.1	9.11

## Sheet: length average
actual fish	geno	L CH post length	L CH ant length	R CH post length	R CH ant length	SUM	divide/4
fish 12	WT	45.7	17.14	43.6	3.42	109.86	27.465
fish 9	WT	31.3	0	20.7	0	52	13
fish 15	WT	41.7	27.4	42.2	32.4	143.7	35.925
fish 6	WT	40.8	37.7	50.4	27.9	156.8	39.2
fish 21	mut	41.4	0	32.6	27.2	101.2	25.3
fish 28	mut	13.82	18.19	58.9	33.3	124.21	31.0525
fish 24	mut	43.4	7.21	41.1	0	91.71	22.9275
fish 25	mut	9.61	0	9.98	3.89	23.48	5.87
fish 27	mut	37.2	0	29	0	66.2	16.55
fish 22	mut	15.02	1.74	24.4	0	41.16	10.29
fish 20	mut	38.3	3.25	35.9	12.46	89.91	22.4775
fish 7	WT	27.9	17.57	34.9	26.6	106.97	26.7425
fish 19	mut	55	19.72	63.6	17.97	156.29	39.0725
fish 8	WT	0	0	18.24	13.34	31.58	7.895
fish 11	WT	58.1	38	67.2	4.51	167.81	41.9525
fish 14	WT	51.8	4.12	26	0	81.92	20.48
fish 23	mut	23.2	0	28.8	10.97	62.97	15.7425
fish 4	WT	22.2	0	21.5	0	43.7	10.925
fish 26	mut	39.8	25.1	36.9	12.53	114.33	28.5825
fish 13	WT	32.6	14.26	24.1	0	70.96	17.74
fish 10	WT	0	0	28	0	28	7
fish 5	WT	8.85	7.49	15.53	18.2	50.07	12.5175

## Sheet: sort
actual fish	geno	L CH post length	L CH ant length	R CH post length	R CH ant length	SUM	divide/4
fish 21	mut	41.4	0	32.6	27.2	101.2	25.3
fish 28	mut	13.82	18.19	58.9	33.3	124.21	31.0525
fish 24	mut	43.4	7.21	41.1	0	91.71	22.9275
fish 25	mut	9.61	0	9.98	3.89	23.48	5.87
fish 27	mut	37.2	0	29	0	66.2	16.55
fish 22	mut	15.02	1.74	24.4	0	41.16	10.29
fish 20	mut	38.3	3.25	35.9	12.46	89.91	22.4775
fish 19	mut	55	19.72	63.6	17.97	156.29	39.0725
fish 23	mut	23.2	0	28.8	10.97	62.97	15.7425
fish 26	mut	39.8	25.1	36.9	12.53	114.33	28.5825
fish 12	WT	45.7	17.14	43.6	3.42	109.86	27.465
fish 9	WT	31.3	0	20.7	0	52	13
fish 15	WT	41.7	27.4	42.2	32.4	143.7	35.925
fish 6	WT	40.8	37.7	50.4	27.9	156.8	39.2
fish 7	WT	27.9	17.57	34.9	26.6	106.97	26.7425
fish 8	WT	0	0	18.24	13.34	31.58	7.895
fish 11	WT	58.1	38	67.2	4.51	167.81	41.9525
fish 14	WT	51.8	4.12	26	0	81.92	20.48
fish 4	WT	22.2	0	21.5	0	43.7	10.925
fish 13	WT	32.6	14.26	24.1	0	70.96	17.74
fish 10	WT	0	0	28	0	28	7
fish 5	WT	8.85	7.49	15.53	18.2	50.07	12.5175

## Sheet: avg,stdev,SEM
actual fish	geno	expression (avg. length)							27.465	25.3
fish 21	mut	25.3							13	31.0525
fish 28	mut	31.0525							35.925	22.9275
fish 24	mut	22.9275							39.2	5.87
fish 25	mut	5.87							26.7425	16.55
fish 27	mut	16.55							7.895	10.29
fish 22	mut	10.29							41.9525	22.4775
fish 20	mut	22.4775							20.48	39.0725
fish 19	mut	39.0725							10.925	15.7425
fish 23	mut	15.7425							17.74	28.5825
fish 26	mut	28.5825							7
fish 12	WT	27.465							12.5175
fish 9	WT	13
fish 15	WT	35.925
fish 6	WT	39.2
fish 7	WT	26.7425
fish 8	WT	7.895
fish 11	WT	41.9525
fish 14	WT	20.48
fish 4	WT	10.925
fish 13	WT	17.74
fish 10	WT	7
fish 5	WT	12.5175
	Average	stdev	SEM
WT	21.7369	12.3486	3.56472
mut	21.7865	9.96901	3.15248

## Sheet: ANOVA
Anova: Single Factor
SUMMARY
Groups	Count	Sum	Average	Variance
Column 1	12	260.843	21.7369	152.487
Column 2	10	217.865	21.7865	99.3811
ANOVA
Source of Variation	SS	df	MS	F	P-value	F crit
Between Groups	0.0134326	1	0.0134326	0.000104461	0.991947	4.35124
Within Groups	2571.79	20	128.589
Total	2571.8	21
