# Supplementary figures and images for: hdac4 mediates perichondral ossification and pharyngeal skeleton development in the zebrafish
Source: PeerJ journal article supplement (doi:10.7717/peerj.6167), 2019-01-08

Page: 1 / 3  
6/30/2018

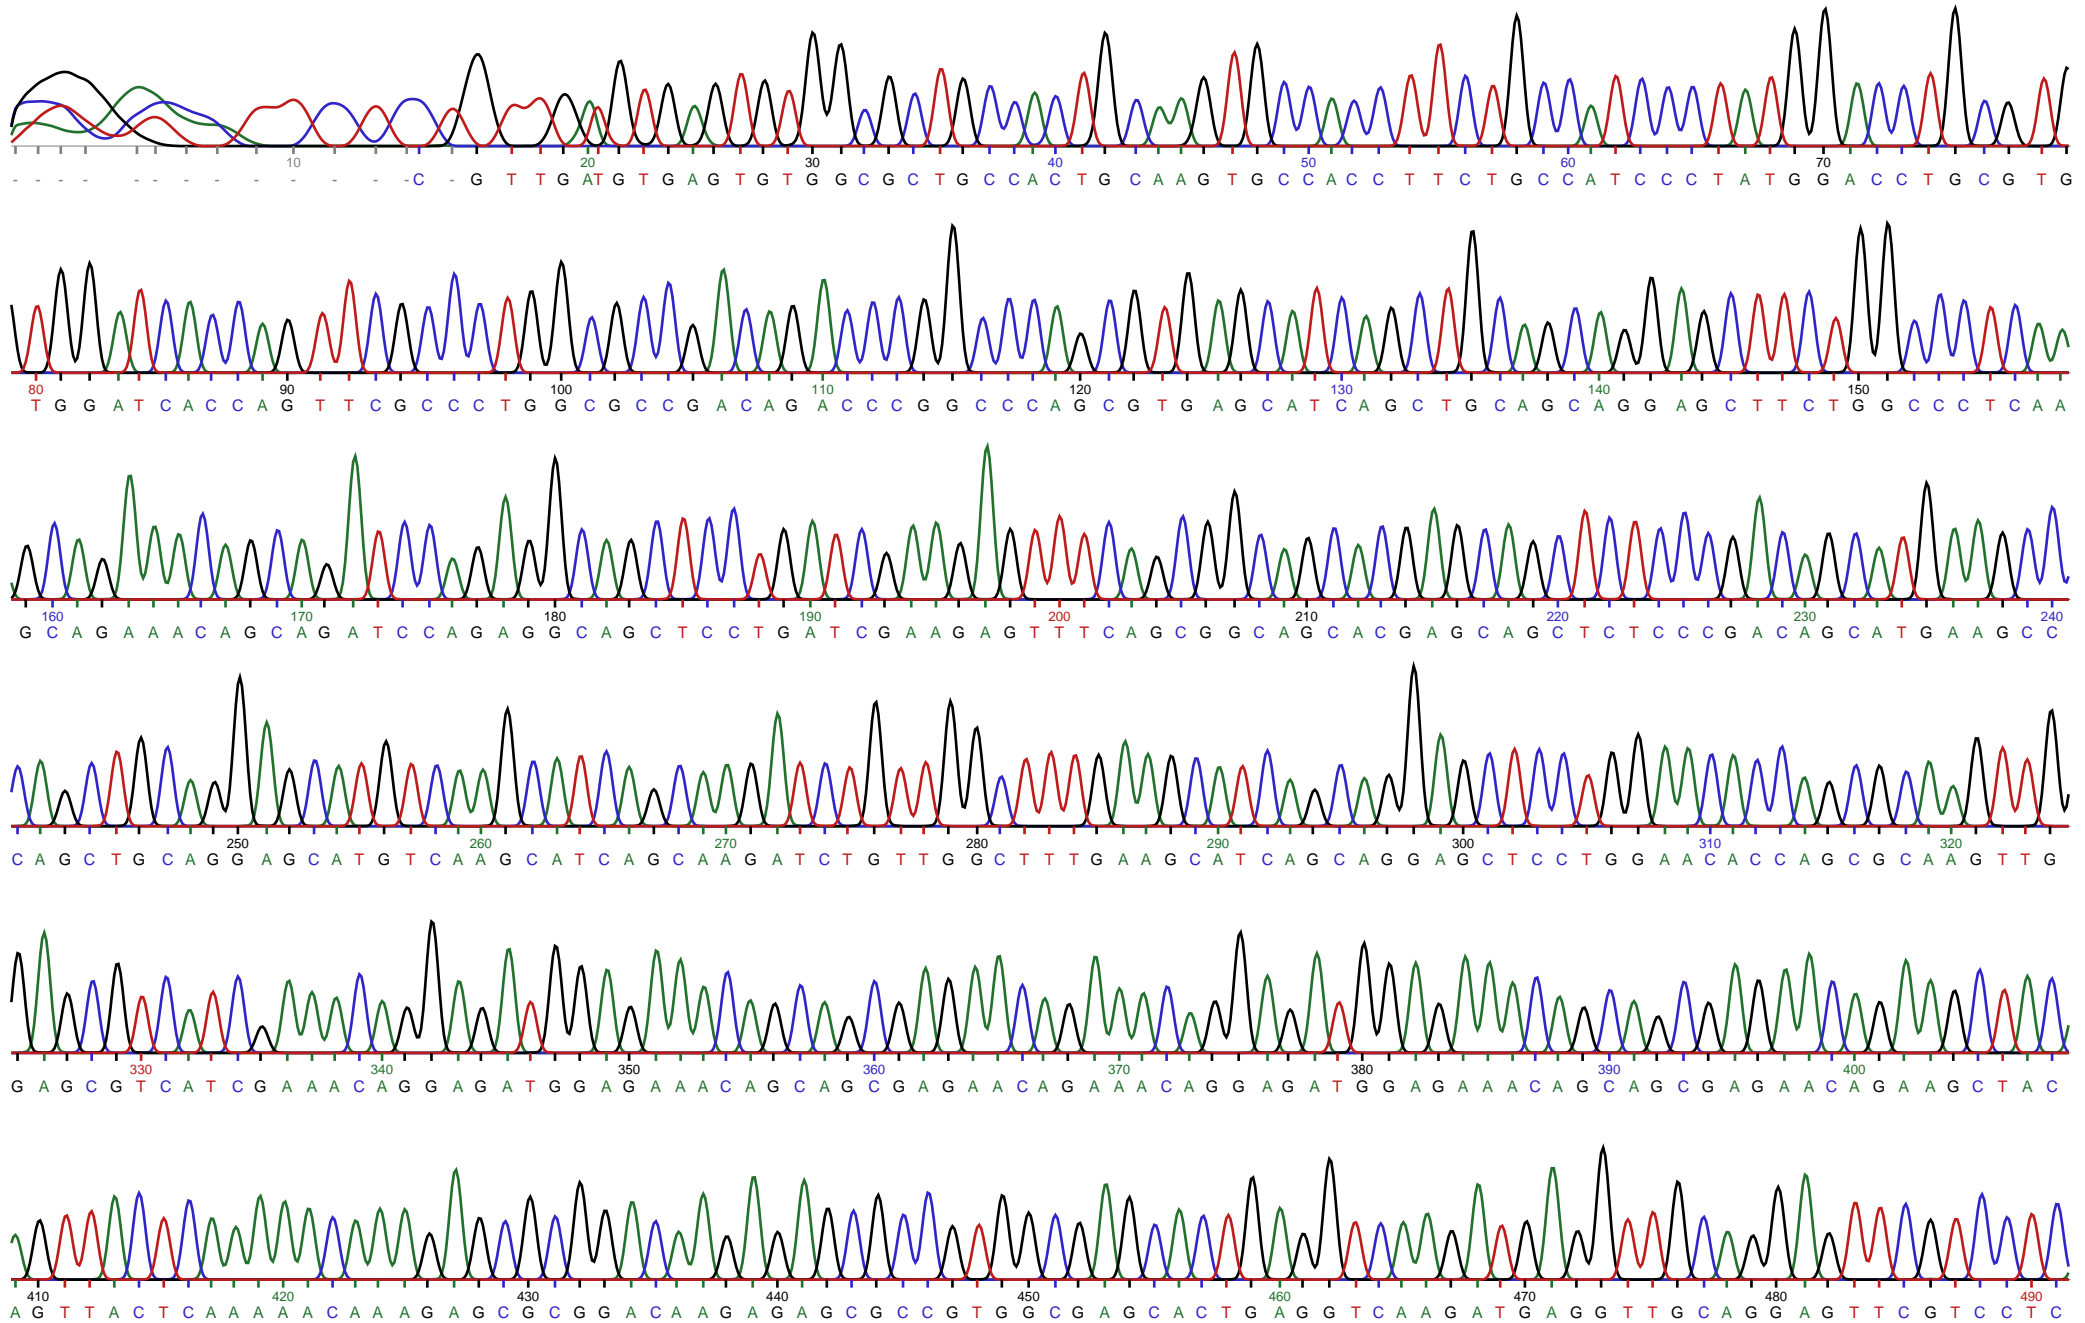

Samples: 17618  
Bases: 535  
Average spacing: 33

Page: 2 / 3  
6/30/2018

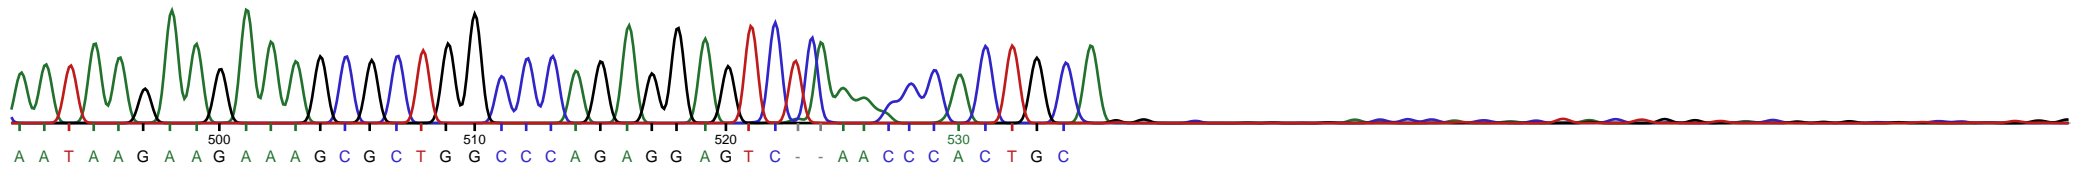

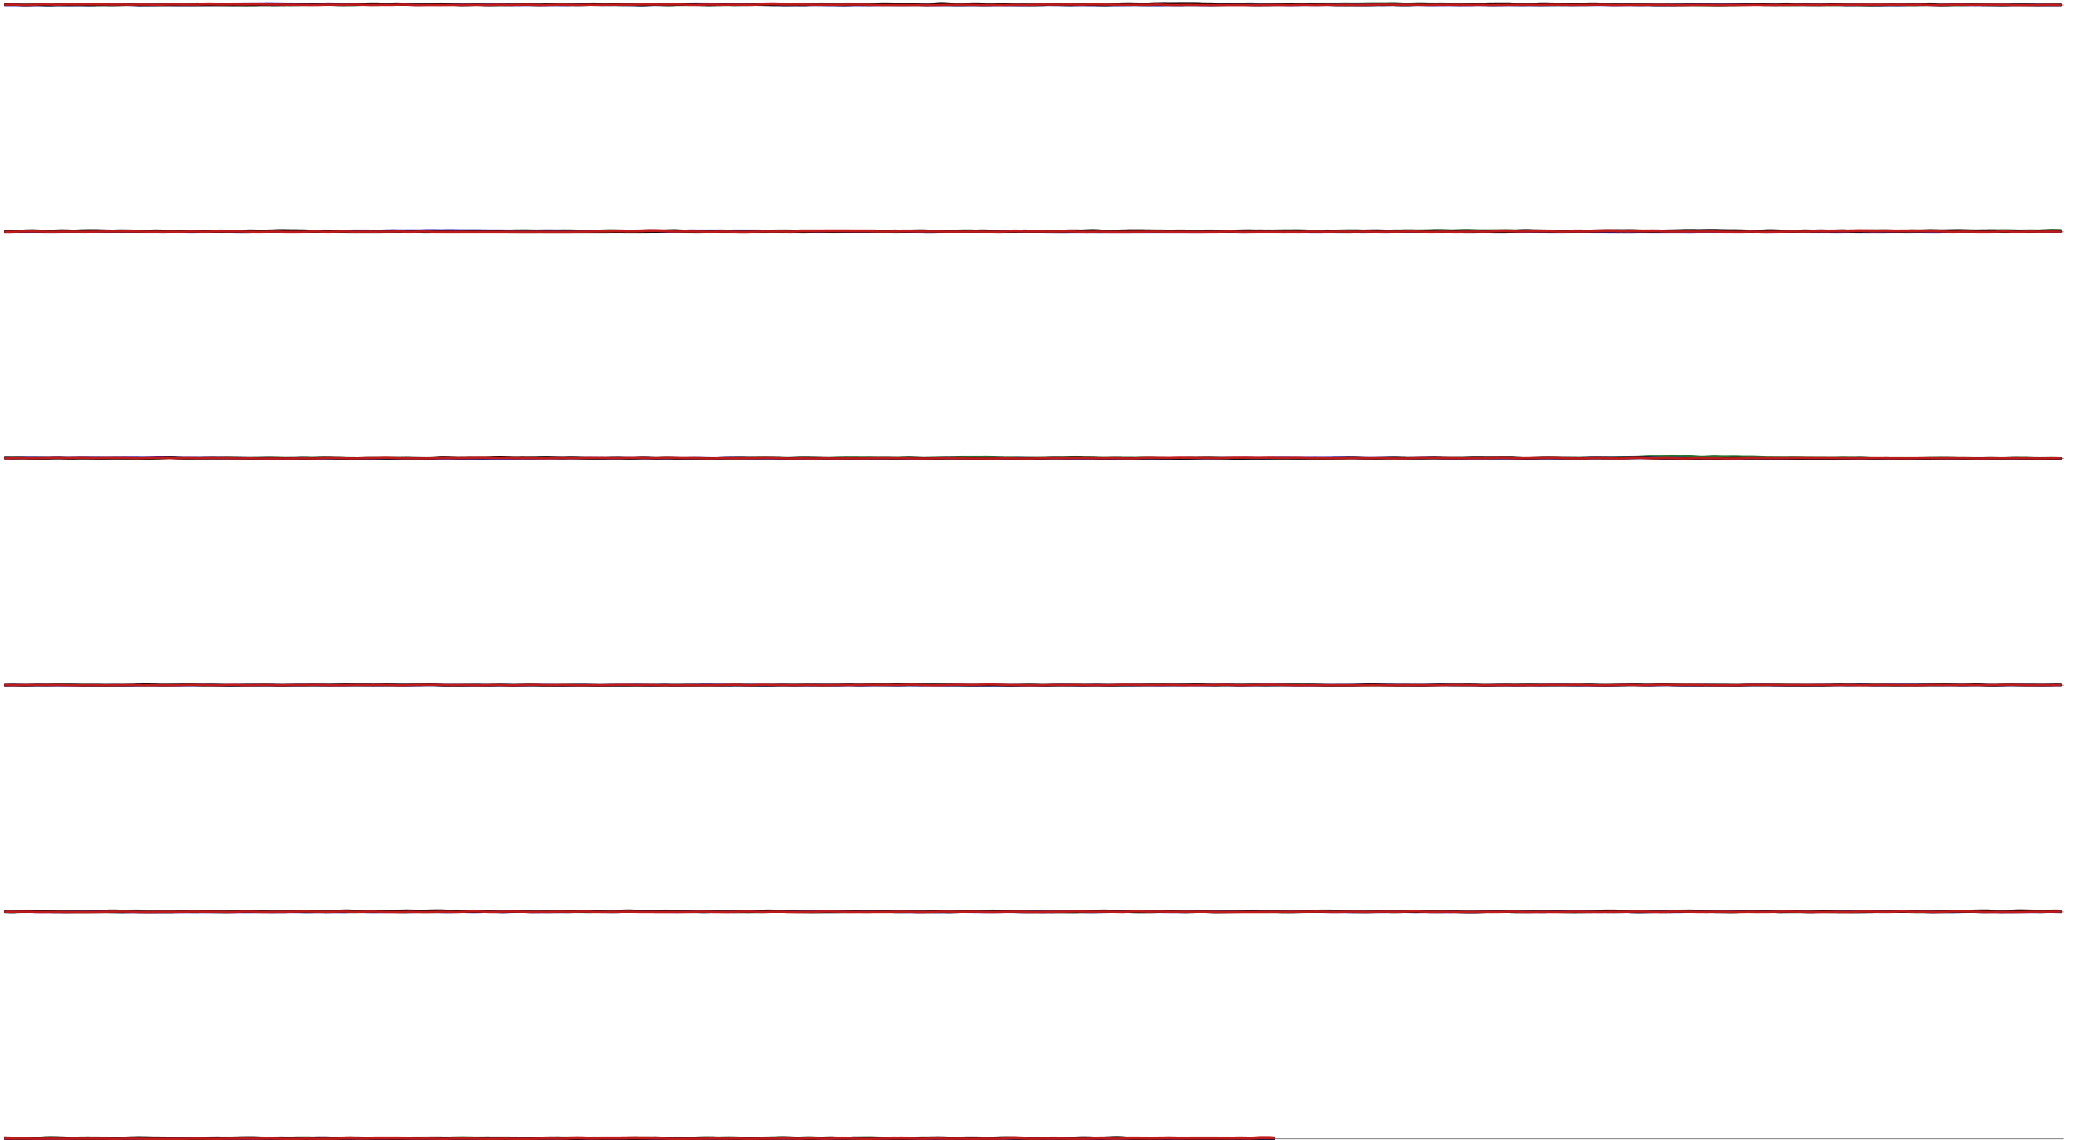

Supplement: 1448982_(2).zip [file 1448982_%282%29.zip]

Page: 1 / 3  
6/30/2018

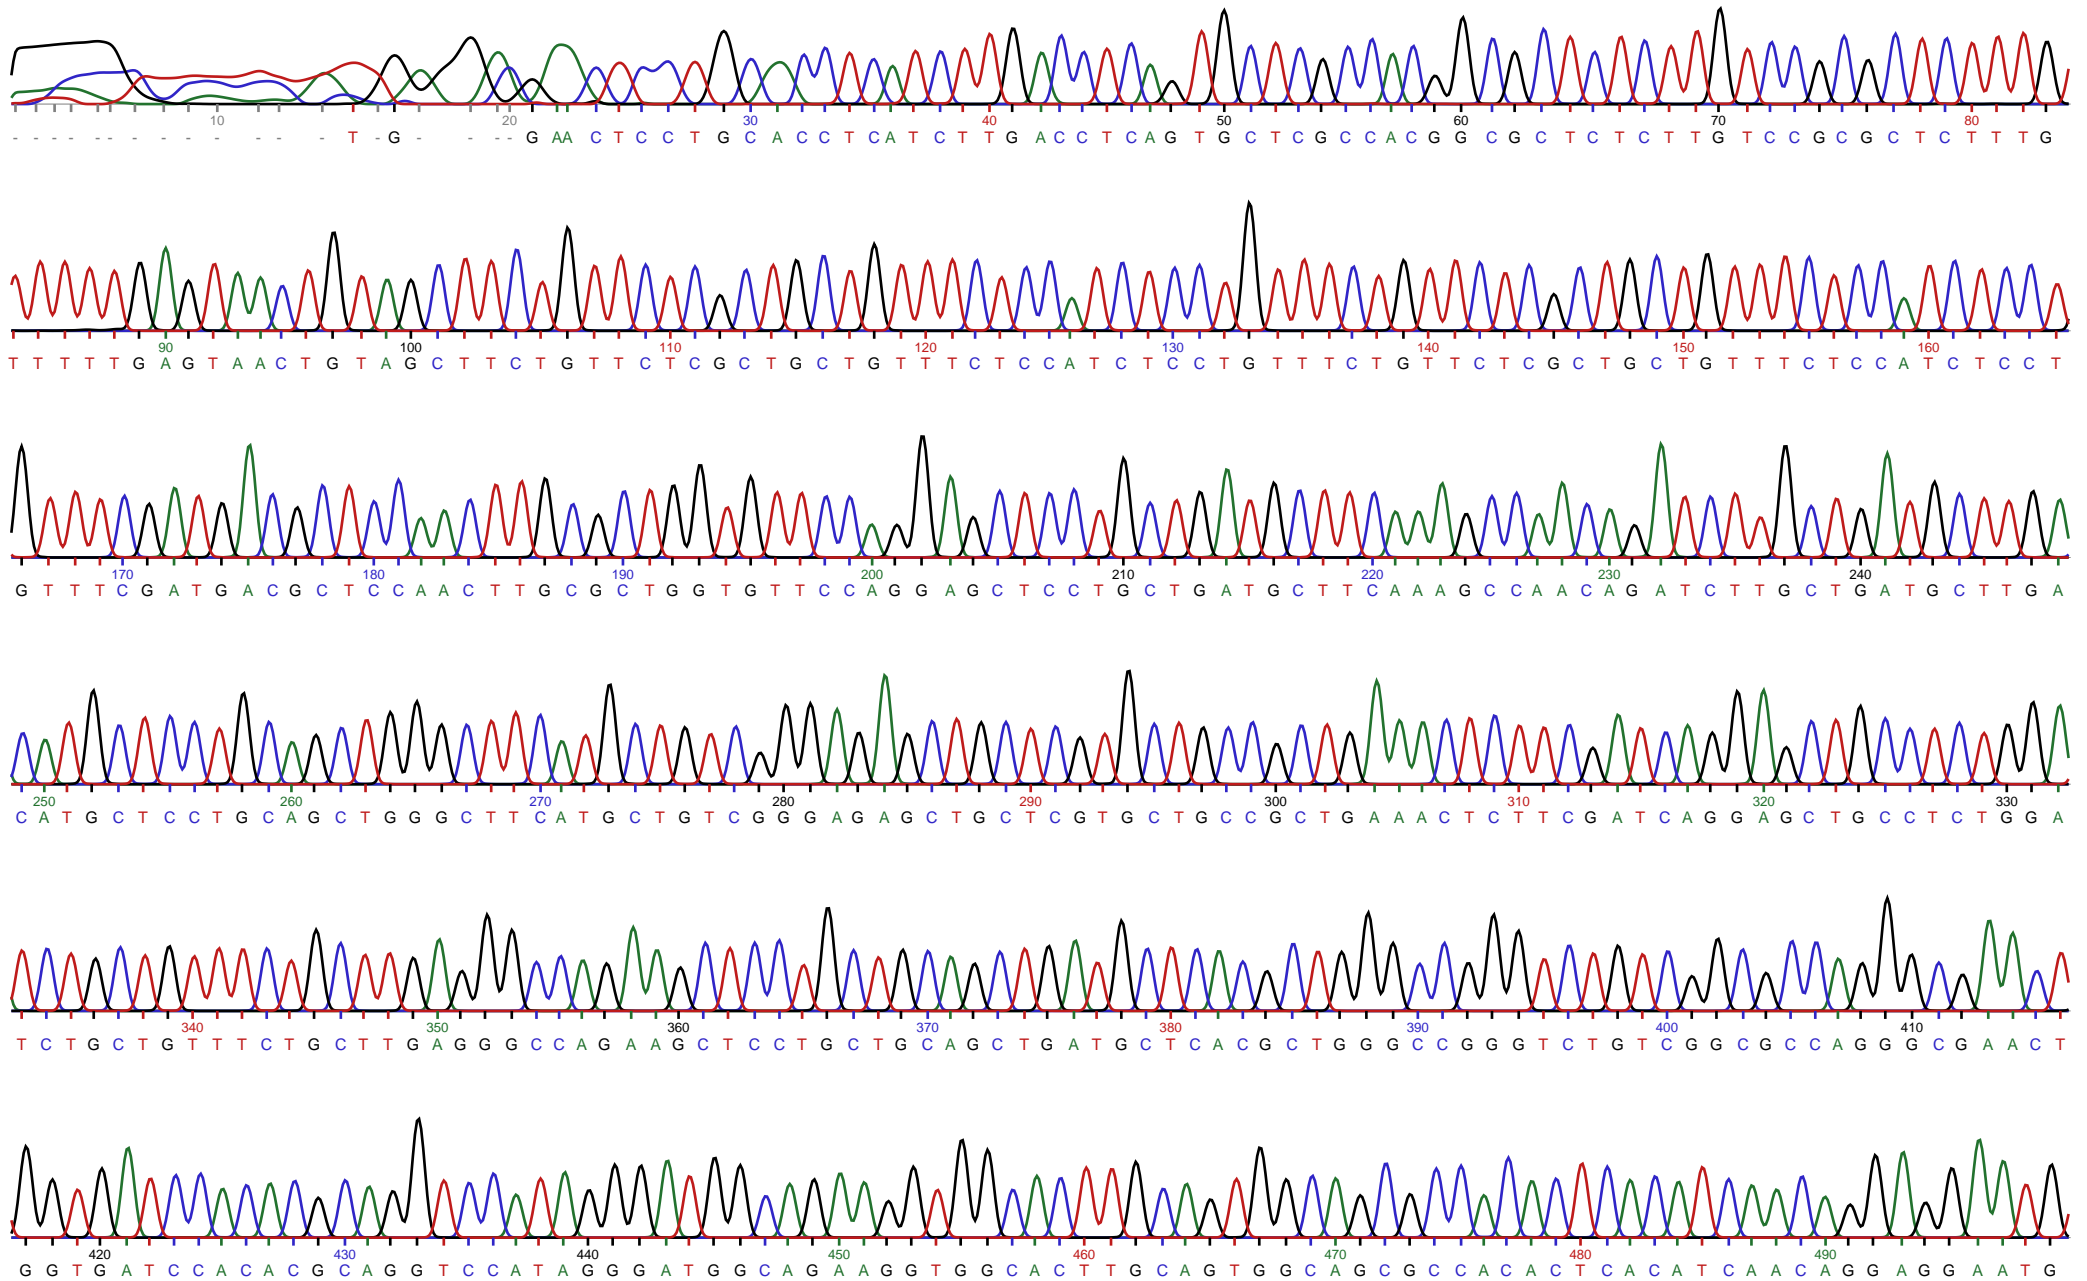

Samples: 15385  
Bases: 537  
Average spacing: 29

Page: 2 / 3  
6/30/2018

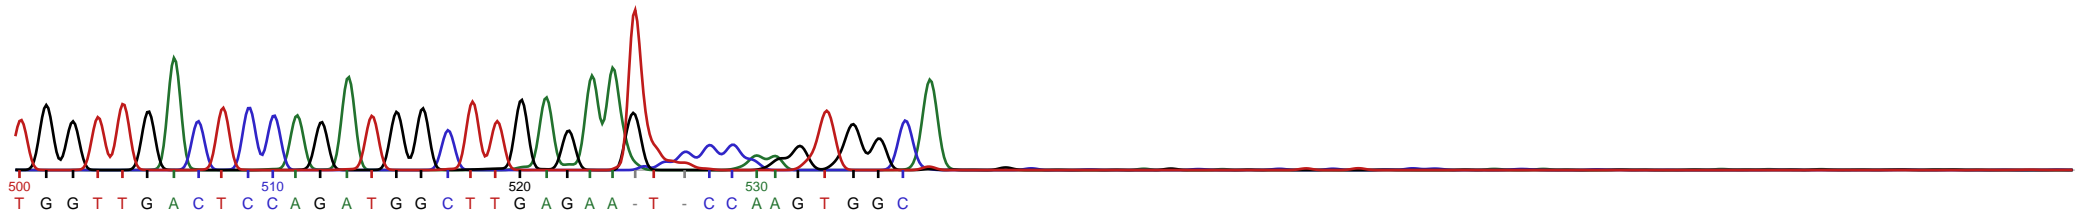

---

---

---

---

Supplement: 1448982_(2).zip [file 1448982_%282%29.zip]

Samples: 19399  
Bases: 509  
Average spacing: 39

Page: 1 / 4  
6/30/2018

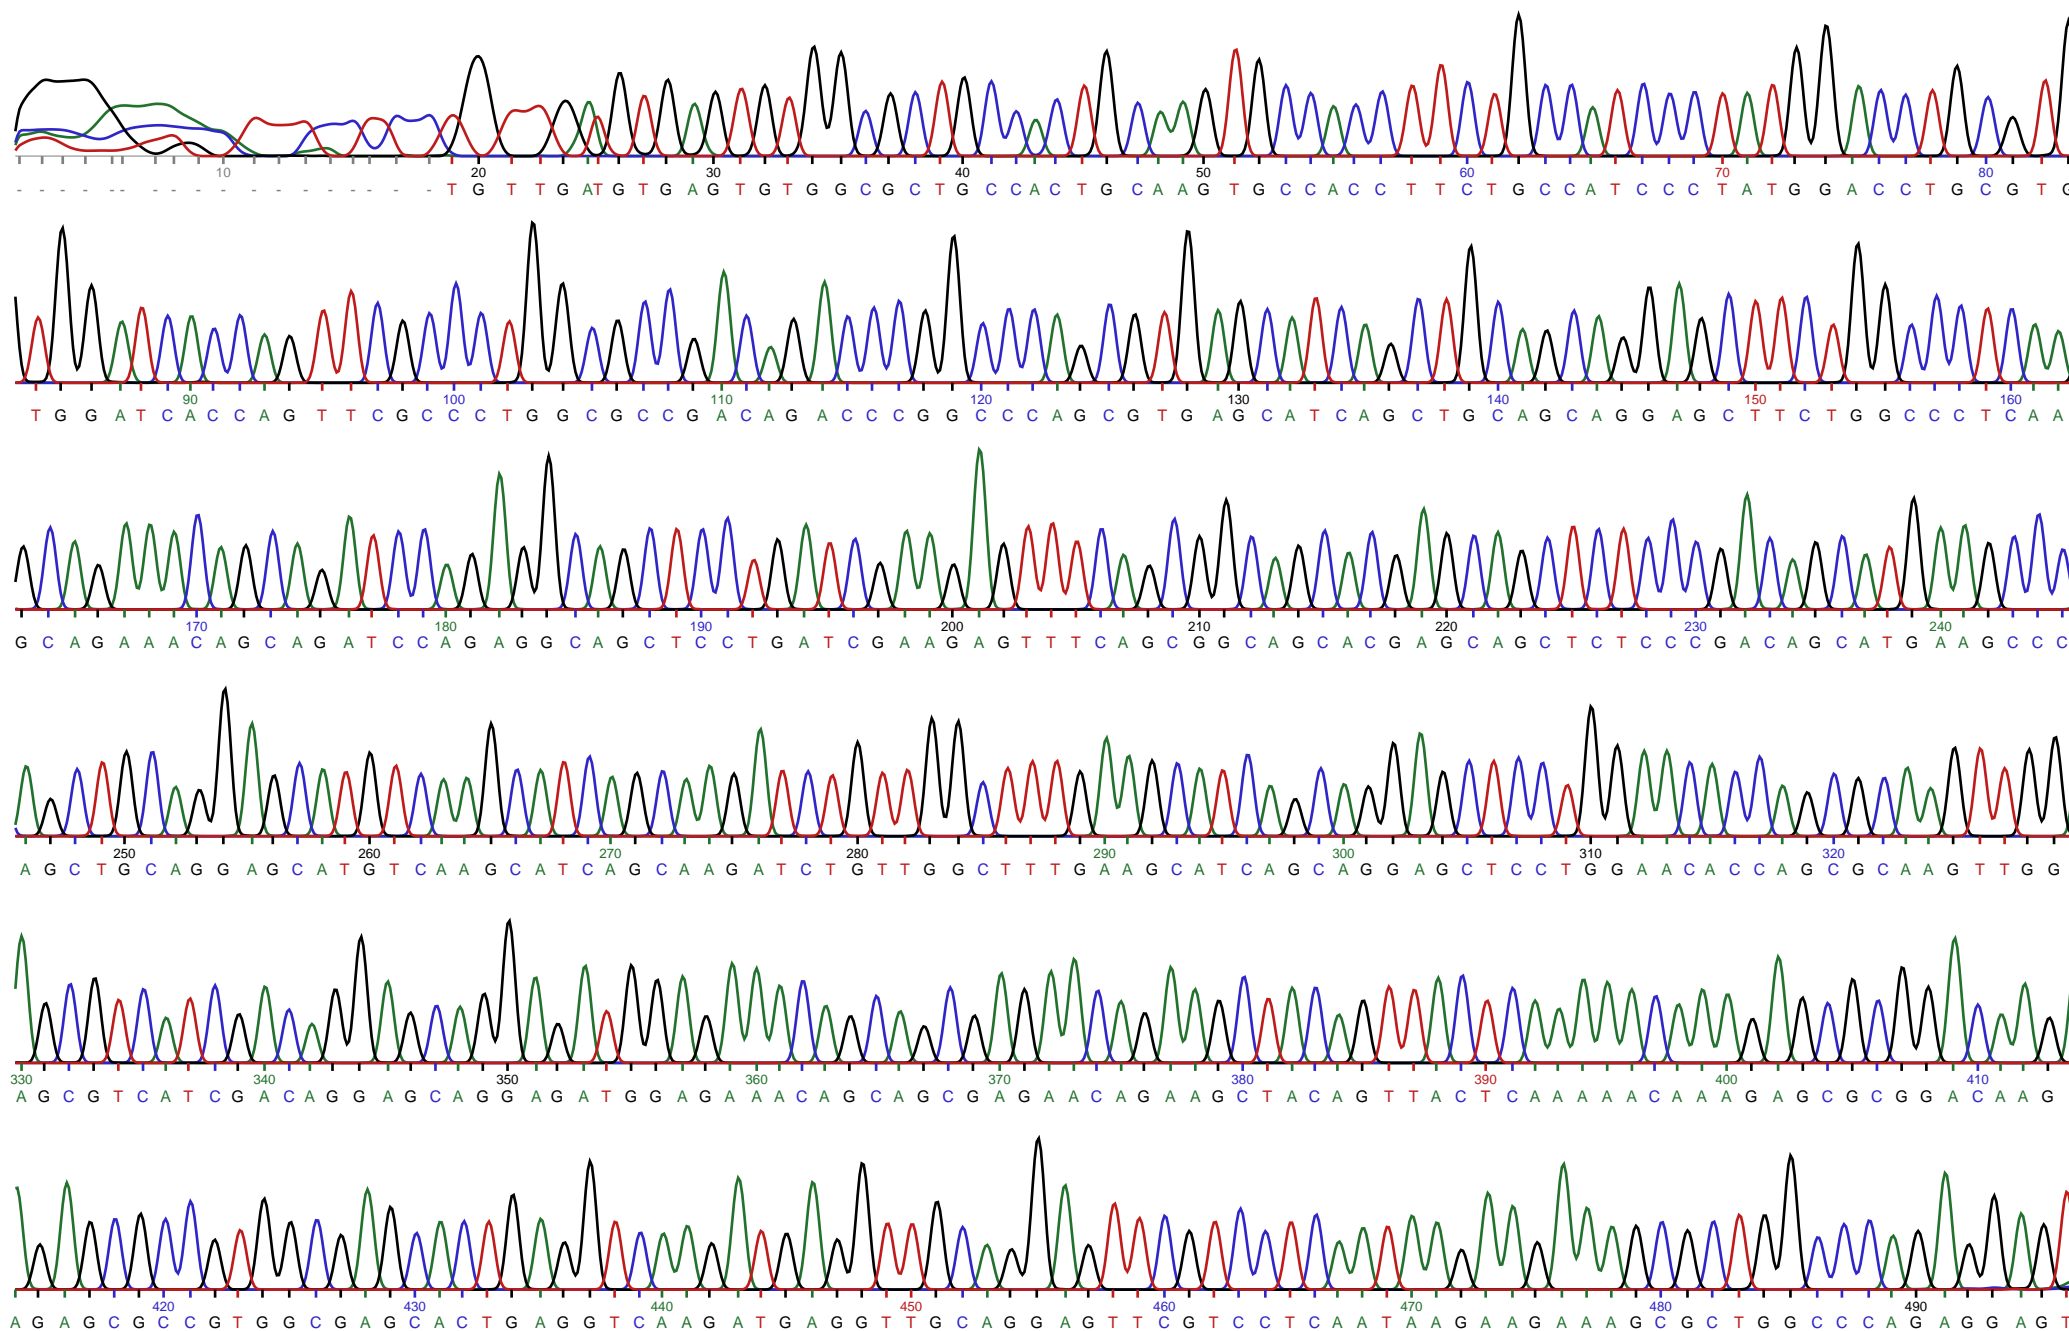

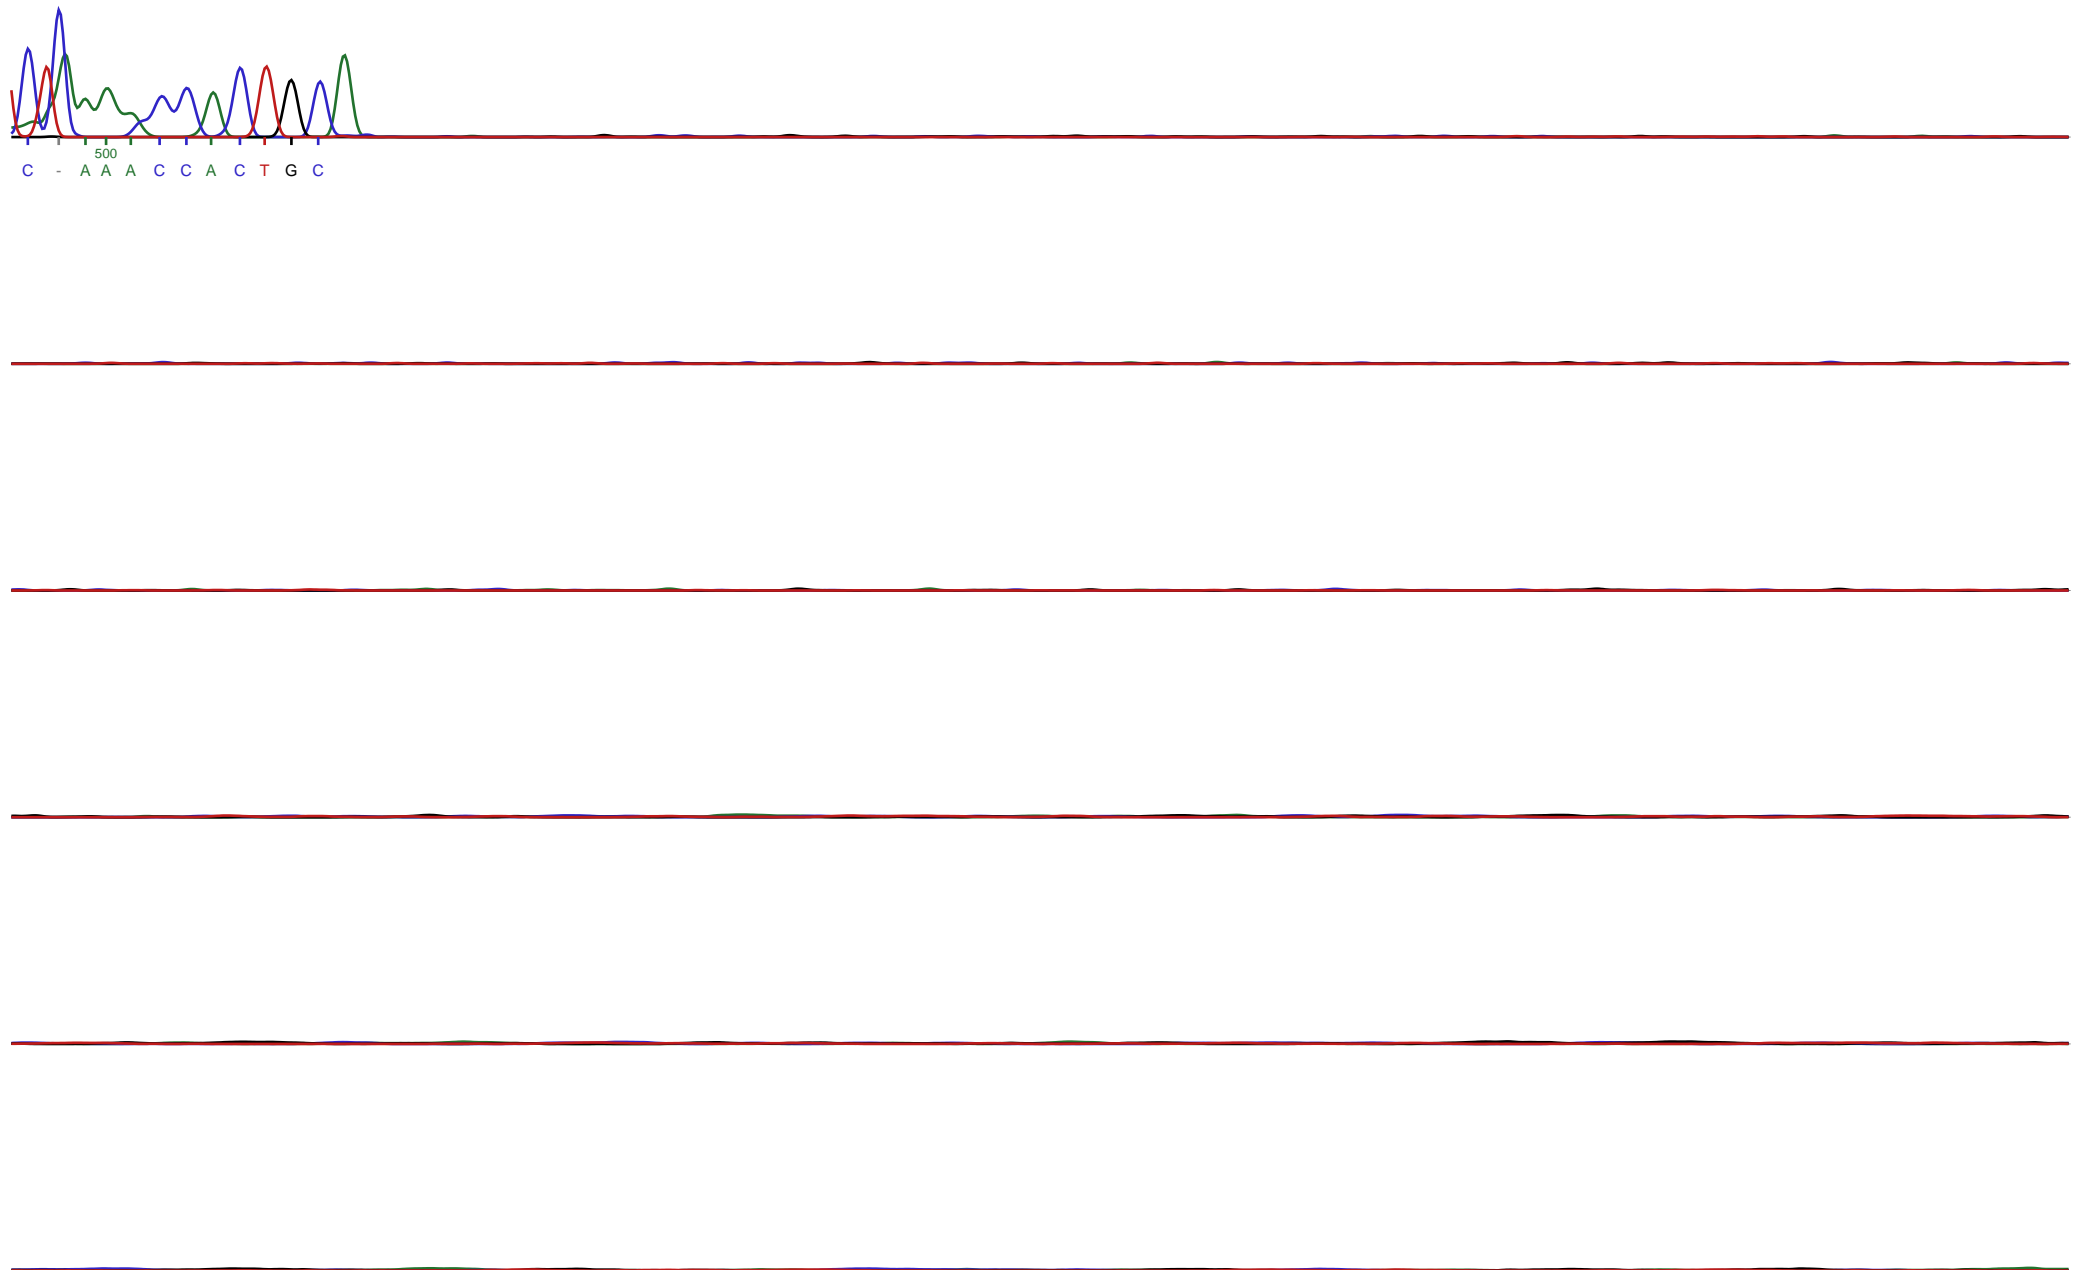

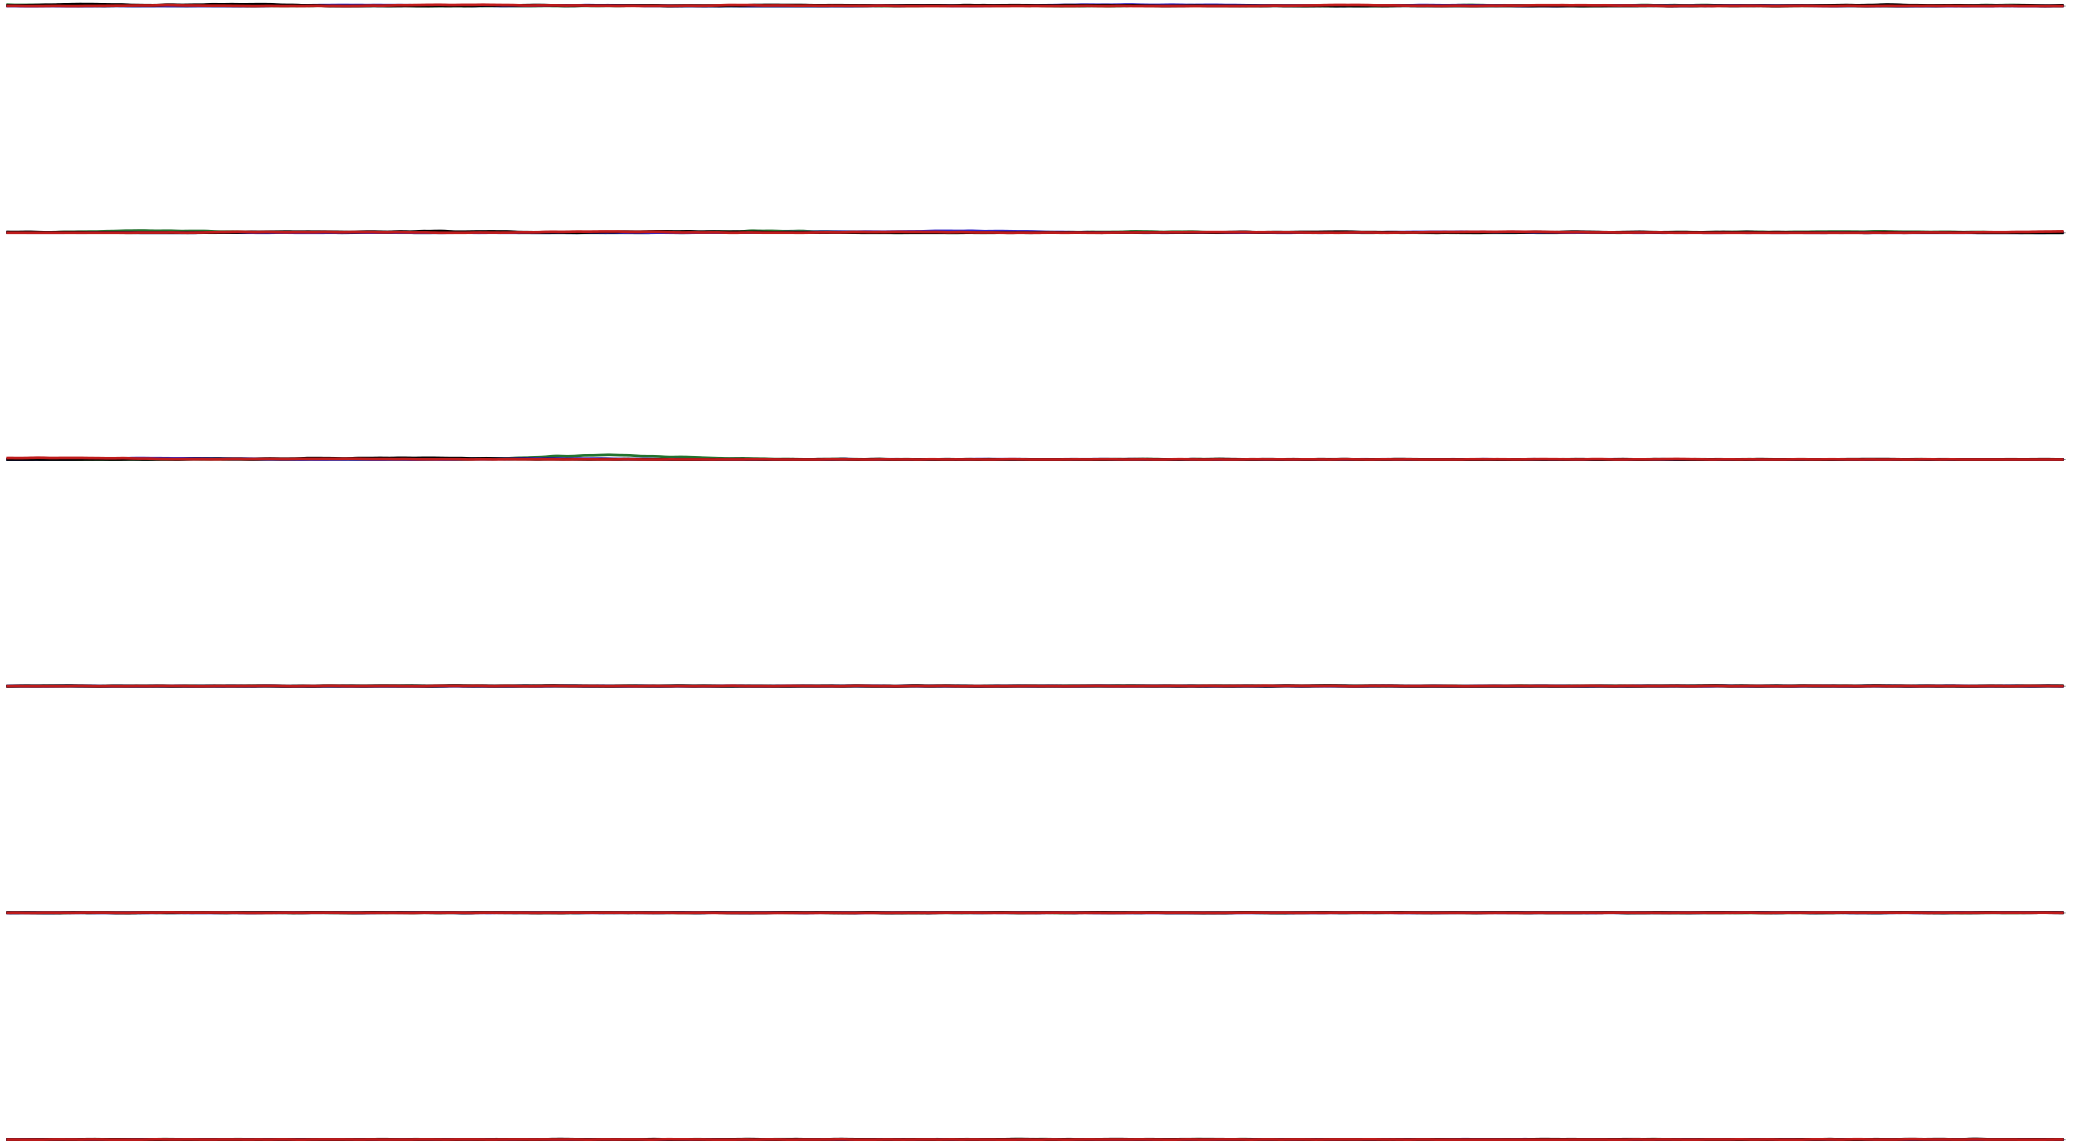

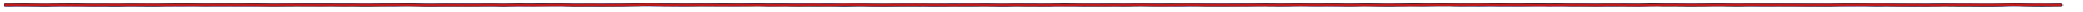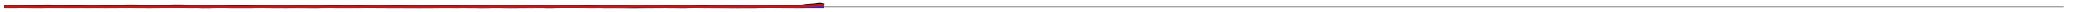

Supplement: 1448982_(2).zip [file 1448982_%282%29.zip]

Page: 1 / 3  
6/30/2018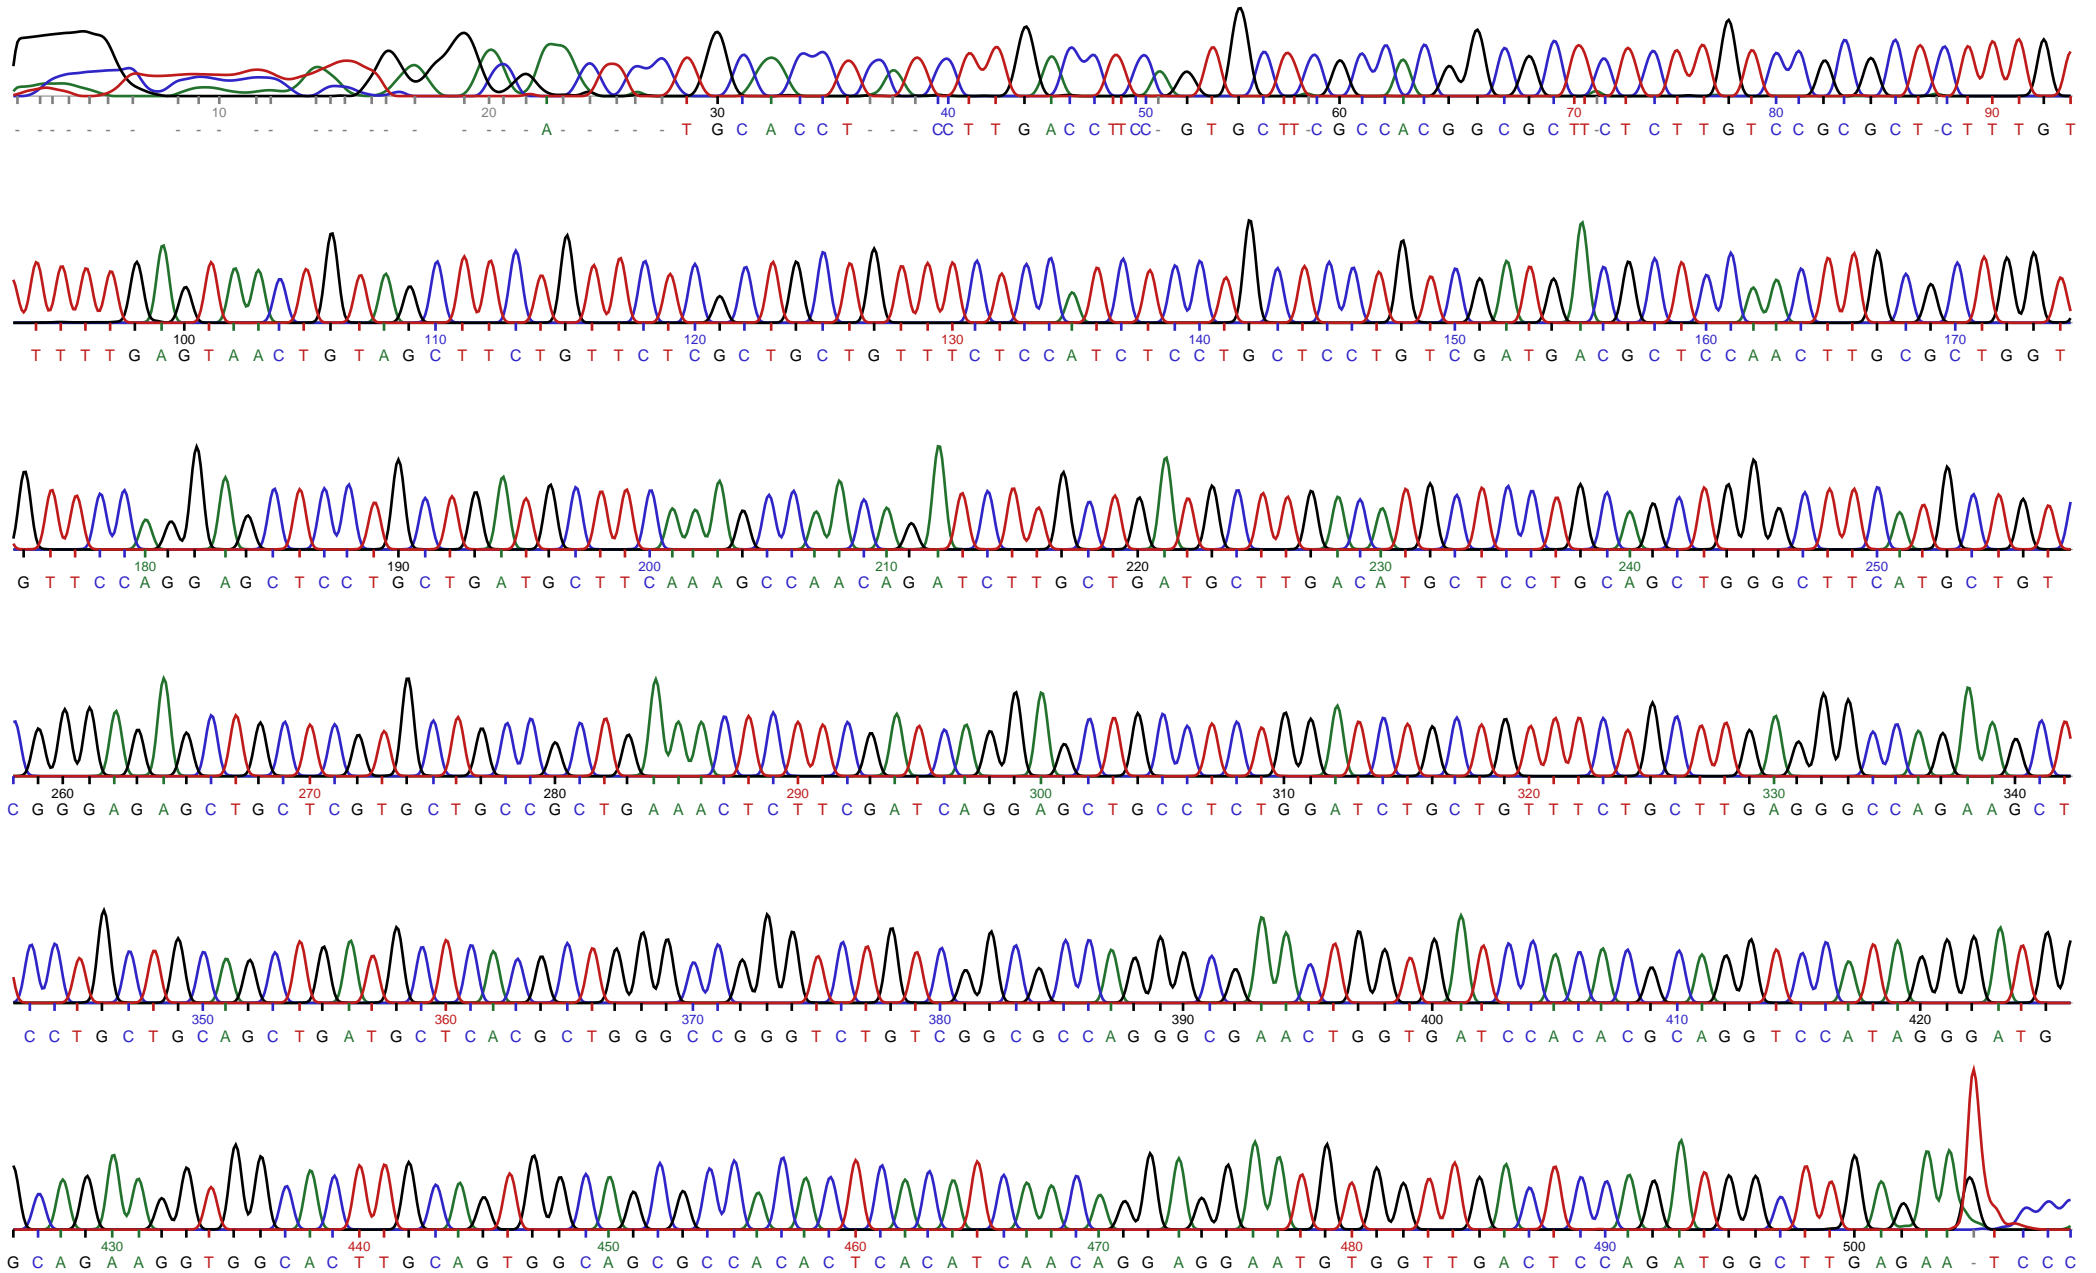

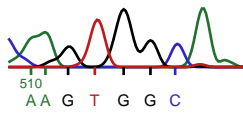

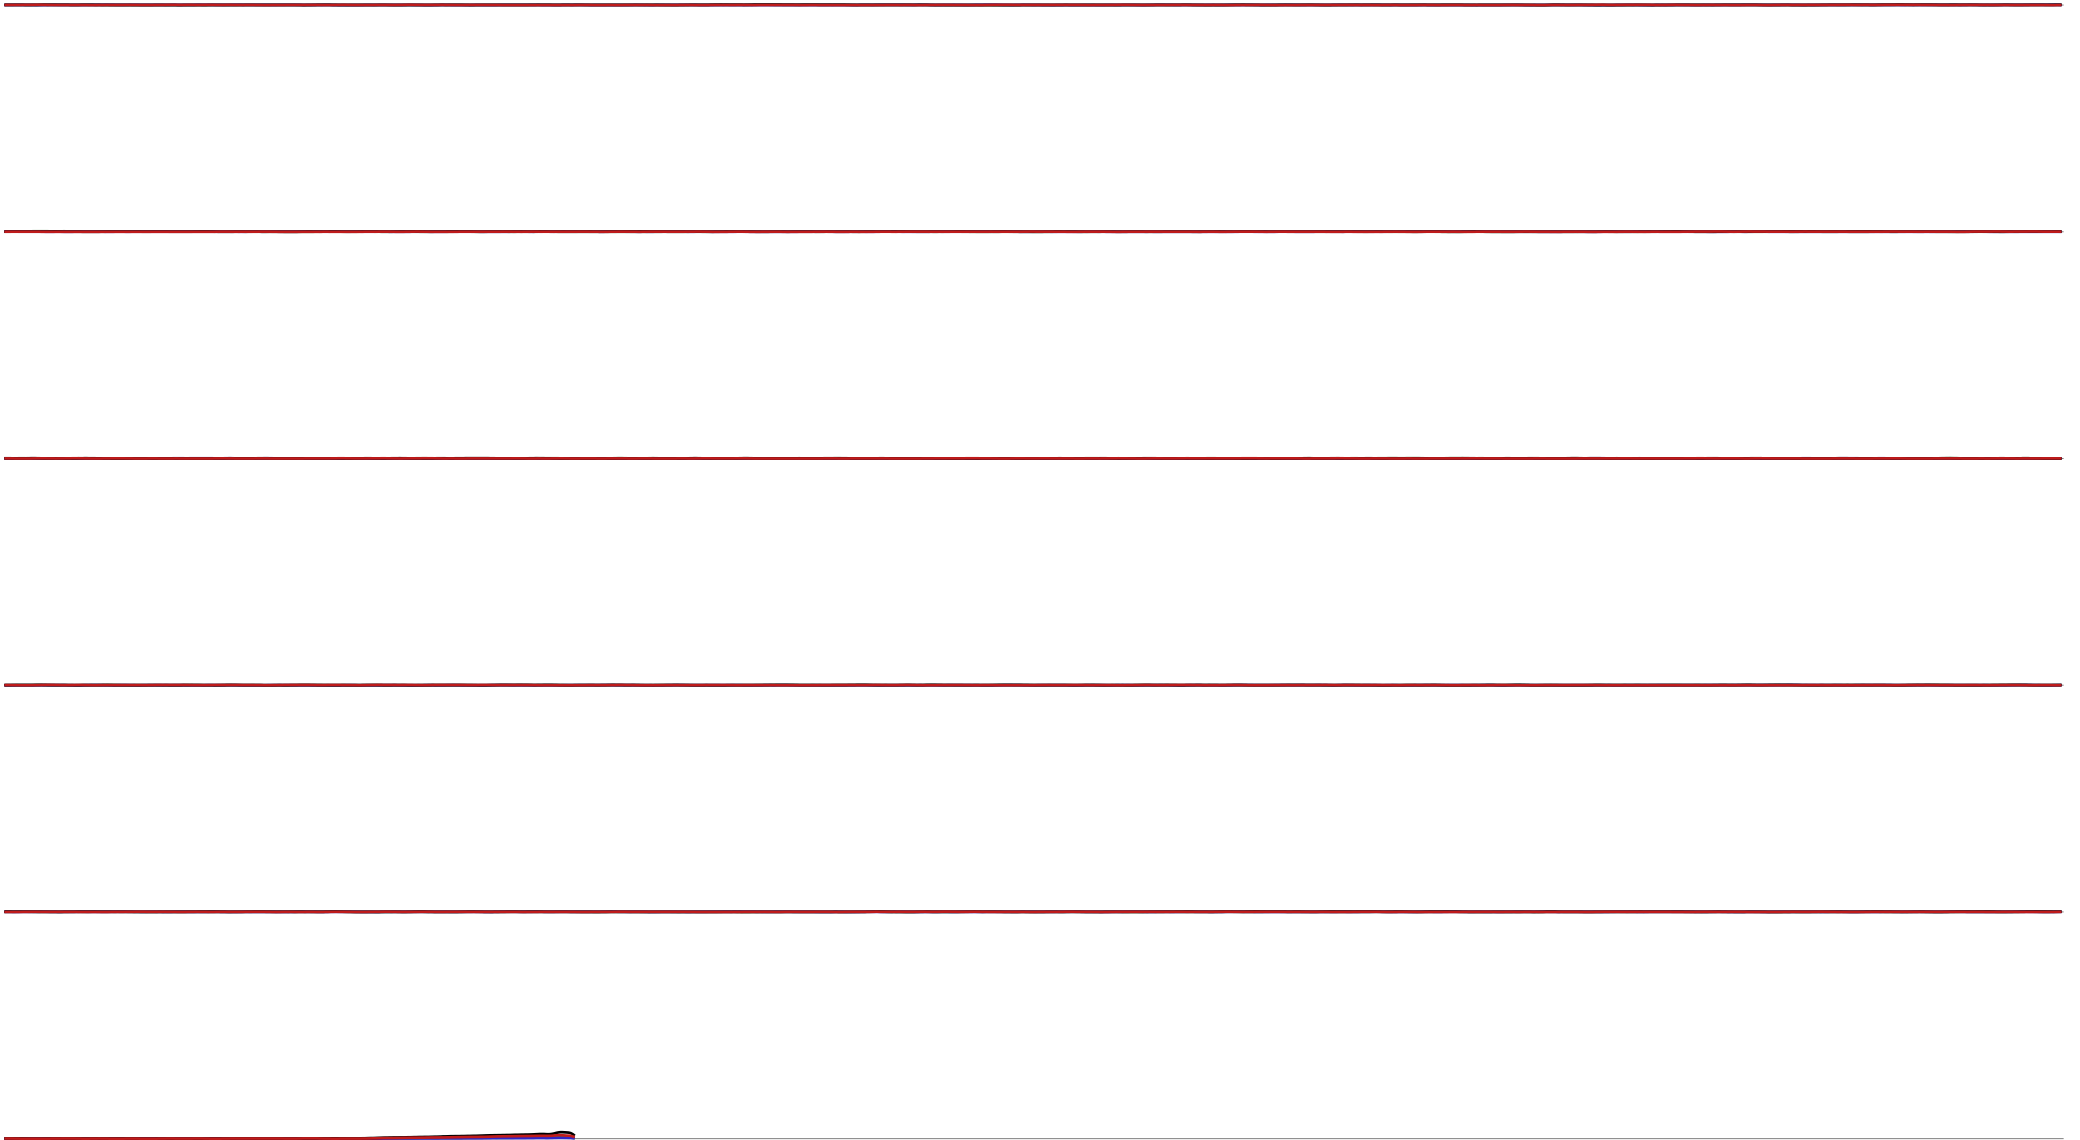

Supplement: 1448982_(2).zip [file 1448982_%282%29.zip]
